# Supplementary material for: Nutrient-induced acidification modulates soil biodiversity-function relationships
Source: PubMed Central journal article supplement (PMC10991381; doi:10.1038/s41467-024-47323-3), 2024-04-03
Supplement: 41467_2024_47323_MOESM1_ESM.pdf [file 41467_2024_47323_MOESM1_ESM.pdf]

## Supplementary information

### Nutrient-induced acidification modulates soil biodiversity-function relationships

Zhengkun Hu<sup>1,2</sup>, Manuel Delgado-Baquerizo<sup>3</sup>, Nicolas Fanin<sup>4</sup>, Xiaoyun Chen<sup>1</sup>, Yan Zhou<sup>1</sup>, Guozhen Du<sup>5</sup>, Feng Hu<sup>1</sup>, Lin Jiang<sup>6</sup>, Shuijin Hu<sup>7</sup>, Manqiang Liu<sup>2\*</sup>

Affiliations of authors:

<sup>1</sup> College of Resources and Environmental Sciences, Nanjing Agricultural University, Nanjing 210095, China

<sup>2</sup> Centre for Grassland Microbiome, State Key Laboratory of Herbage Improvement and Grassland Agro-Ecosystems, College of Pastoral Agriculture Science and Technology, Lanzhou University, Lanzhou 730020, China

<sup>3</sup> Laboratorio de Biodiversidad y Funcionamiento Ecosistémico. Instituto de Recursos Naturales y Agrobiología de Sevilla (IRNAS), CSIC, Av. Reina Mercedes 10, E-41012, Sevilla, Spain

<sup>4</sup> INRAE, Bordeaux Sciences Agro, UMR 1391 ISPA, Villenave-d'Ornon, France

<sup>5</sup> College of Ecology, Lanzhou University, Lanzhou, 730000, China

<sup>6</sup> School of Biological Sciences, Georgia Institute of Technology, Atlanta, USA

<sup>7</sup> Department of Entomology & Plant Pathology, North Carolina State University, Raleigh, NC, USA

\*Corresponding author: Manqiang Liu; Email address: [liumq@njau.edu.cn](mailto:liumq@njau.edu.cn)

Tel: +86 25 84395104; Fax: +86 25 84395210

**This pdf file includes:**

Supplementary Fig. 1 to 16

Supplementary Table 1

Supplementary References

Supplementary code

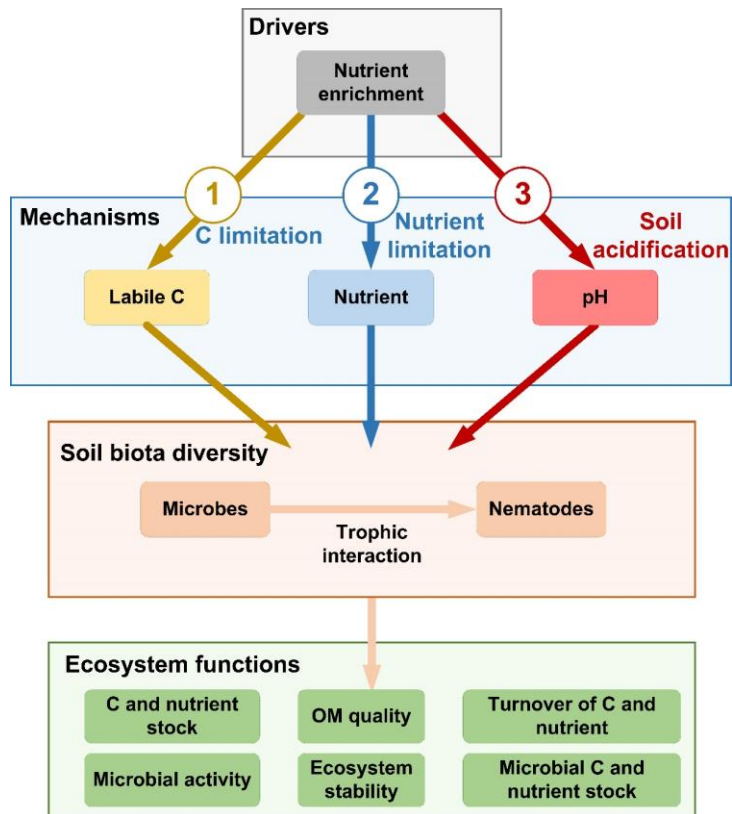

**Supplementary Fig. 1** Schematic diagram of the effects of nutrient enrichment on soil biota diversity and ecosystem functions when considering each of three mechanisms. Mechanism 1 (yellow arrows, ‘C limitation’ hypothesis); Mechanism 2 (blue arrows, ‘nutrient limitation’ hypothesis); Mechanisms 3 (red arrows, ‘soil acidification’ hypothesis).

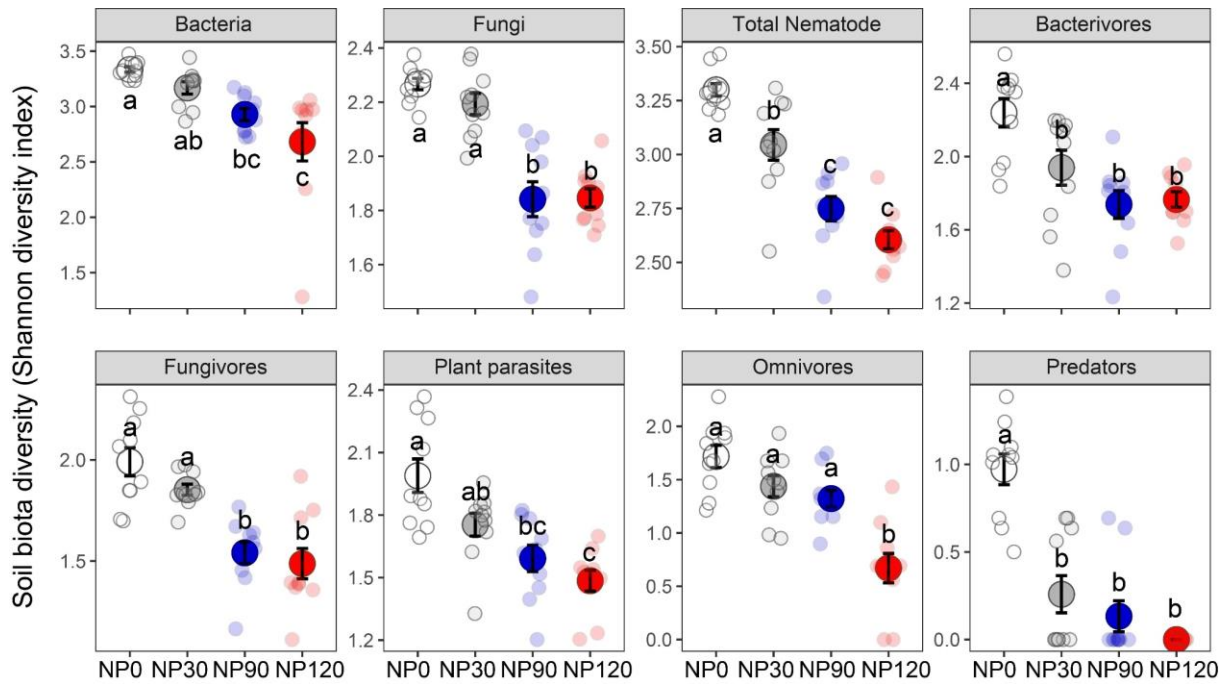

**Supplementary Fig. 2 Effects of nutrient enrichment on the diversity of soil organisms.** Soil biota diversity was calculated using Shannon diversity index. Dots with bars indicate Mean  $\pm$  standard error (SE) ( $n = 10$  independent soil samples per treatment), and jittered points represent biologically independent samples for each treatment. Data were analyzed using one-way ANOVA. Based on two-sided tests for multiple comparisons (Fisher's least significant difference), means with different lowercase letters indicate significant difference among treatments ( $P < 0.05$ ). Source data are provided as a Source Data file.

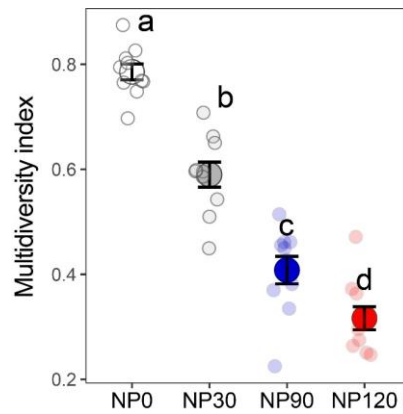

**Supplementary Fig. 3 Effects of nutrient enrichment on soil multidiversity index.** Dots with bars indicate Mean  $\pm$  standard error (SE) ( $n = 10$  independent soil samples per treatment), and jittered points represent biologically independent samples for each treatment. Data were analyzed using one-way ANOVA. Based on two-sided tests for multiple comparisons (Fisher's least significant difference), means with different lowercase letters indicate significant difference among treatments ( $P < 0.05$ ). Source data are provided as a Source Data file.

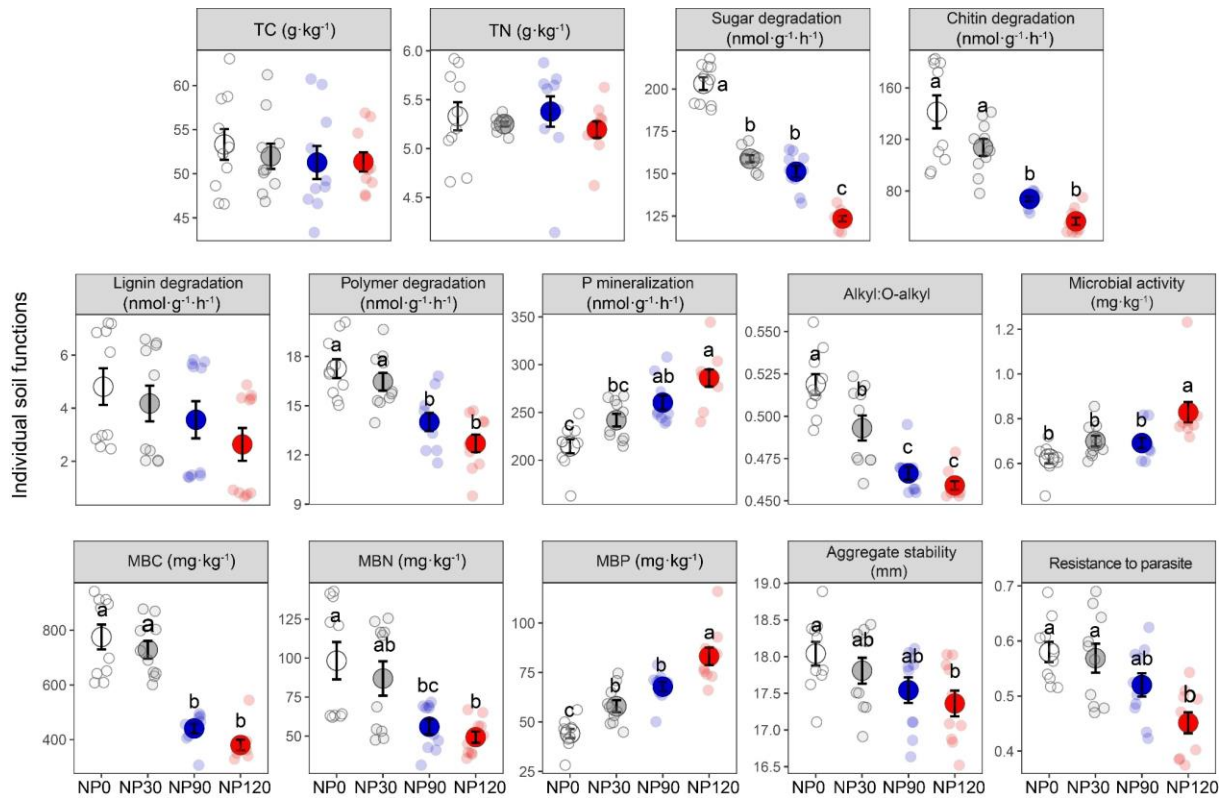

**Supplementary Fig. 4 Effects of nutrient enrichment on soil individual functions.** Dots with bars indicate Mean  $\pm$  standard error (SE) ( $n = 10$  independent soil samples per treatment), and jittered points represent biologically independent samples for each treatment. Data were analyzed using one-way ANOVA. Based on two-sided tests for multiple comparisons (Fisher's least significant difference), means with different lowercase letters indicate significant difference among treatments ( $P < 0.05$ ). TC, total soil carbon; TN, total soil nitrogen; MBC, microbial biomass carbon; MBN, microbial biomass nitrogen; MBP, microbial biomass phosphorus. Source data are provided as a Source Data file.

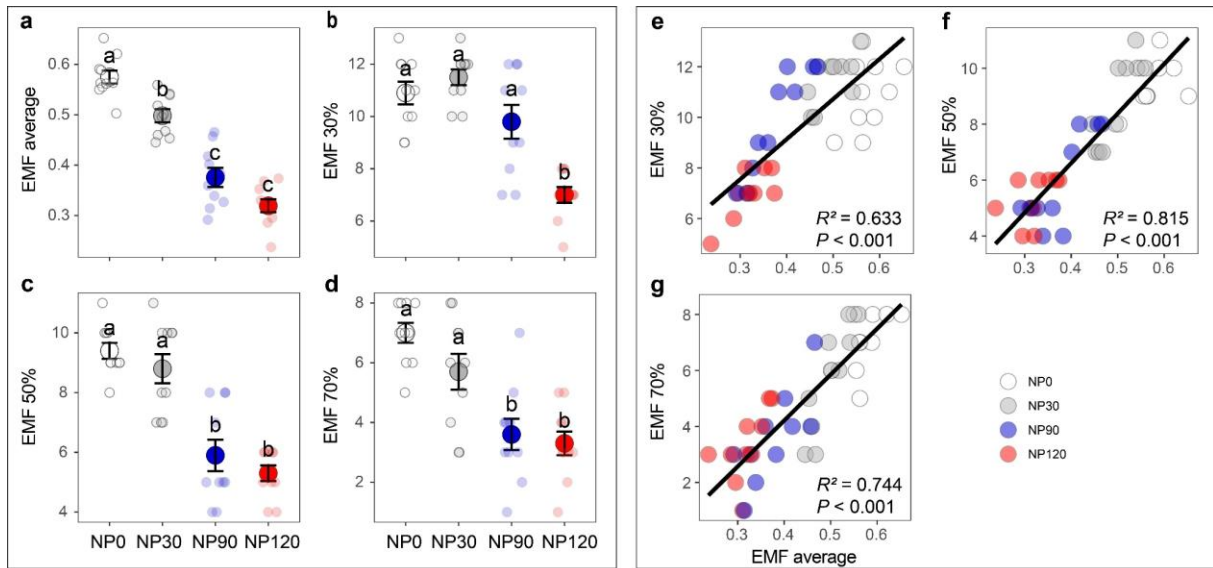

**Supplementary Fig. 5 Effects of nutrient enrichment on the value of multifunctionality indices and the relationships among EMF indices.** **a-d** Effects of nutrient enrichment on the value of multifunctionality indices as calculated by averaging approach and threshold approach at 30% (EMF 30%), 50% (EMF 50%) and 70% (EMF 70%) thresholds. Dots with bars indicate Mean  $\pm$  standard error (SE) ( $n = 10$  independent soil samples per treatment), and jittered points represent biologically independent samples for each treatment. Data were analyzed using one-way ANOVA. Based on two-sided tests for multiple comparisons (Fisher's least significant difference), means with different lowercase letters indicate significant difference among treatments ( $P < 0.05$ ). **e-g** The relationships between average EMF and EMF 30%, EMF 50% and EMF 70% as influenced by nutrient enrichment. Linear regression model with two-sided test was used for the statistical analysis, and multiple R-squared was used. Relationships are denoted with solid lines and fit statistics ( $R^2$  and  $P$  values). The solid line represents the significant linear regression ( $P < 0.05$ ).  $n = 40$  independent soil samples for regression model. Source data are provided as a Source Data file.

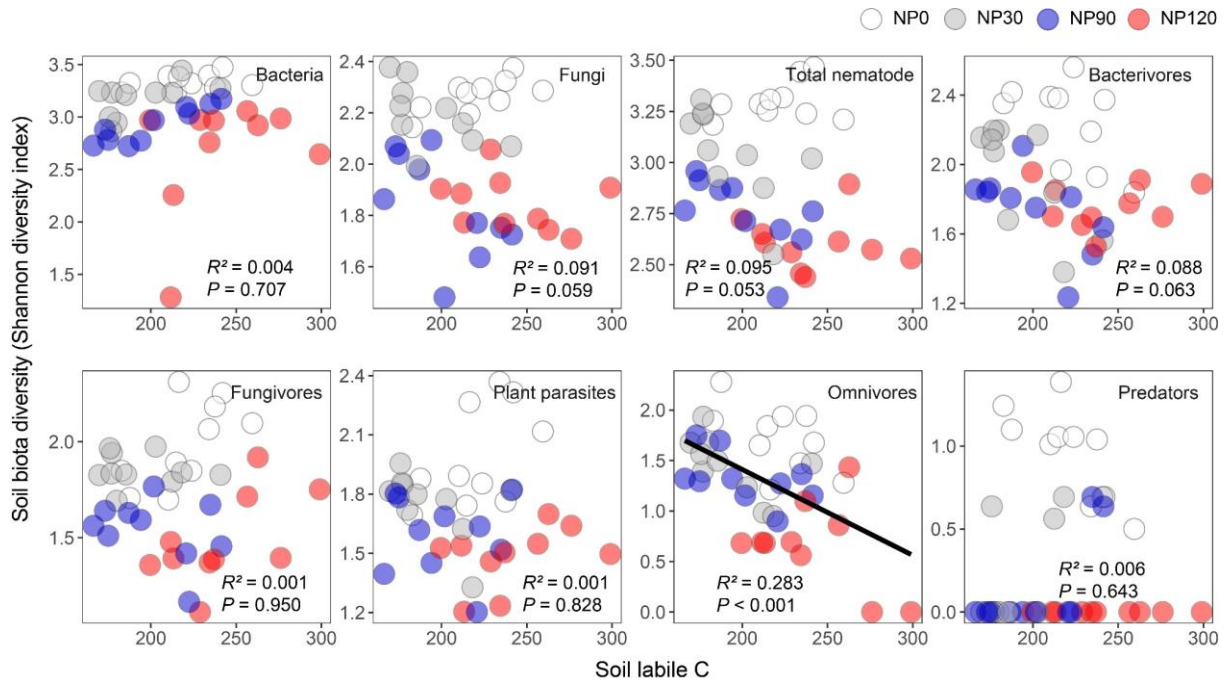

**Supplementary Fig. 6 Relationships between soil labile C and the diversity of soil biota as influenced by nutrient enrichment.** Linear regression model with two-sided test was used for the statistical analysis, and multiple R-squared was used. Relationships are denoted with solid lines and fit statistics ( $R^2$  and  $P$  values). The solid line represents the significant linear regression ( $P < 0.05$ ).  $n = 40$  independent soil samples for regression model. Source data are provided as a Source Data file.



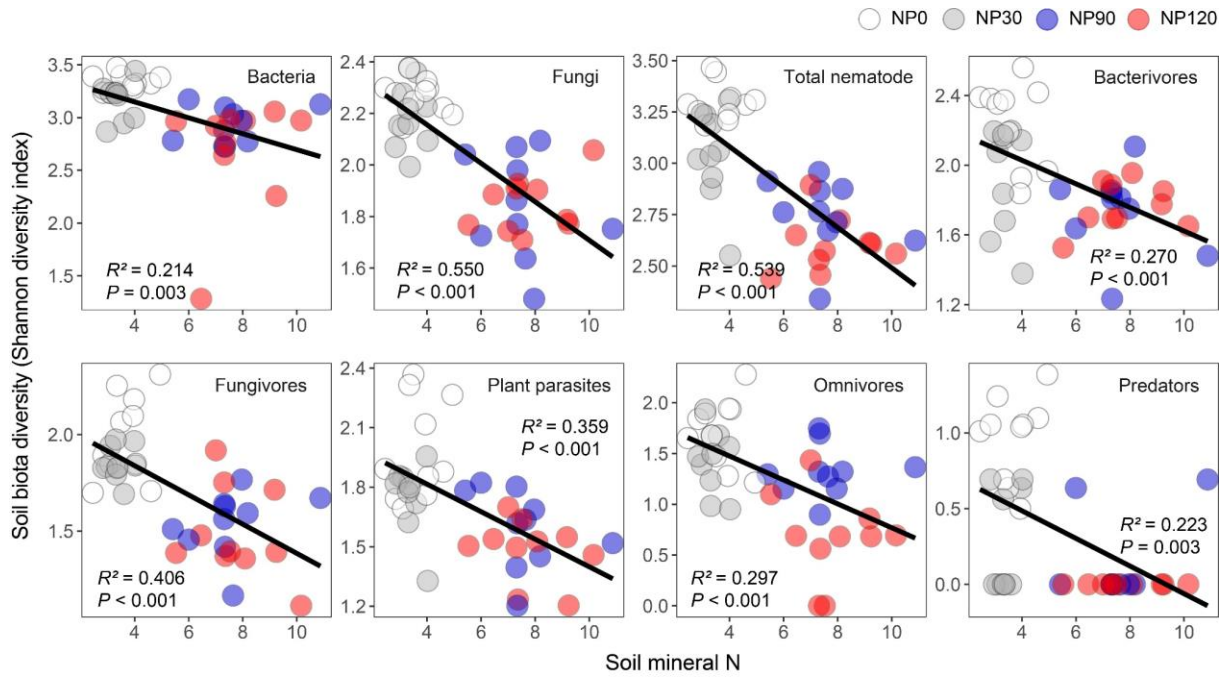

**Supplementary Fig. 7 Relationships between soil mineral N and the diversity of soil biota as influenced by nutrient enrichment.** Linear regression model with two-sided test was used for the statistical analysis, and multiple R-squared was used. Relationships are denoted with solid lines and fit statistics ( $R^2$  and  $P$  values). The solid line represents the significant linear regression ( $P < 0.05$ ).  $n = 40$  independent soil samples for regression model. Source data are provided as a Source Data file.

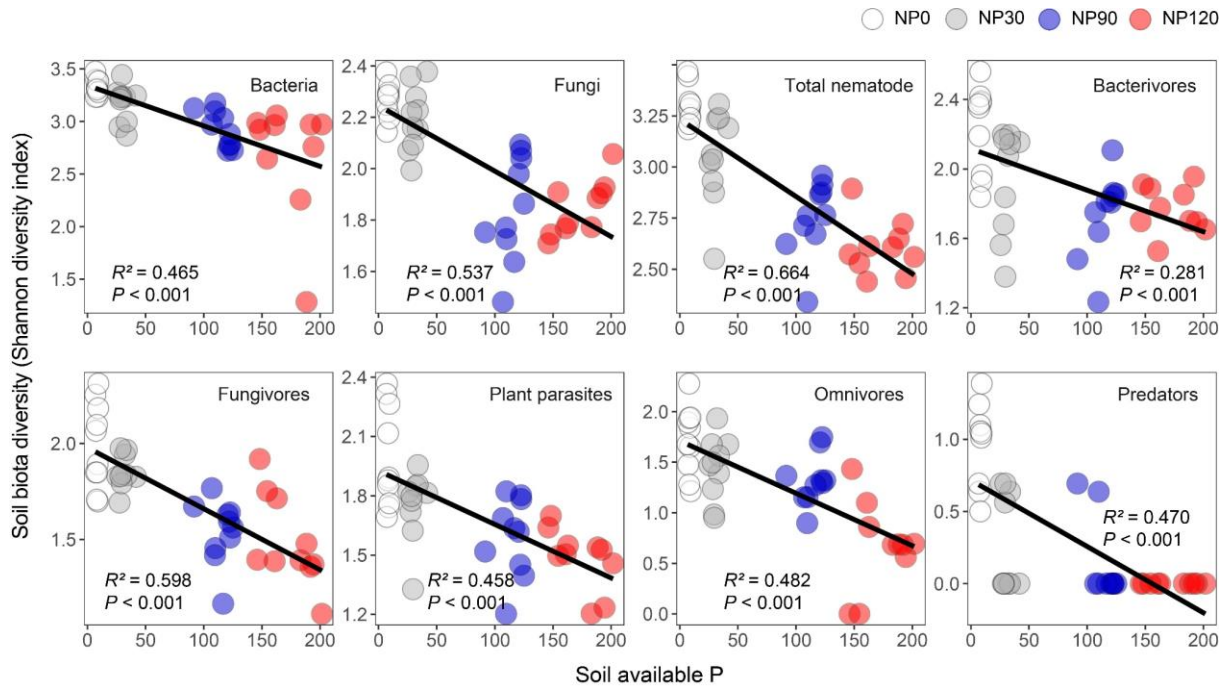

**Supplementary Fig. 8 Relationships between soil available P and the diversity of soil biota as influenced by nutrient enrichment.** Linear regression model with two-sided test was used for the statistical analysis, and multiple R-squared was used. Relationships are denoted with solid lines and fit statistics ( $R^2$  and  $P$  values). The solid line represents the significant linear regression ( $P < 0.05$ ).  $n = 40$  independent soil samples for regression model. Source data are provided as a Source Data file.

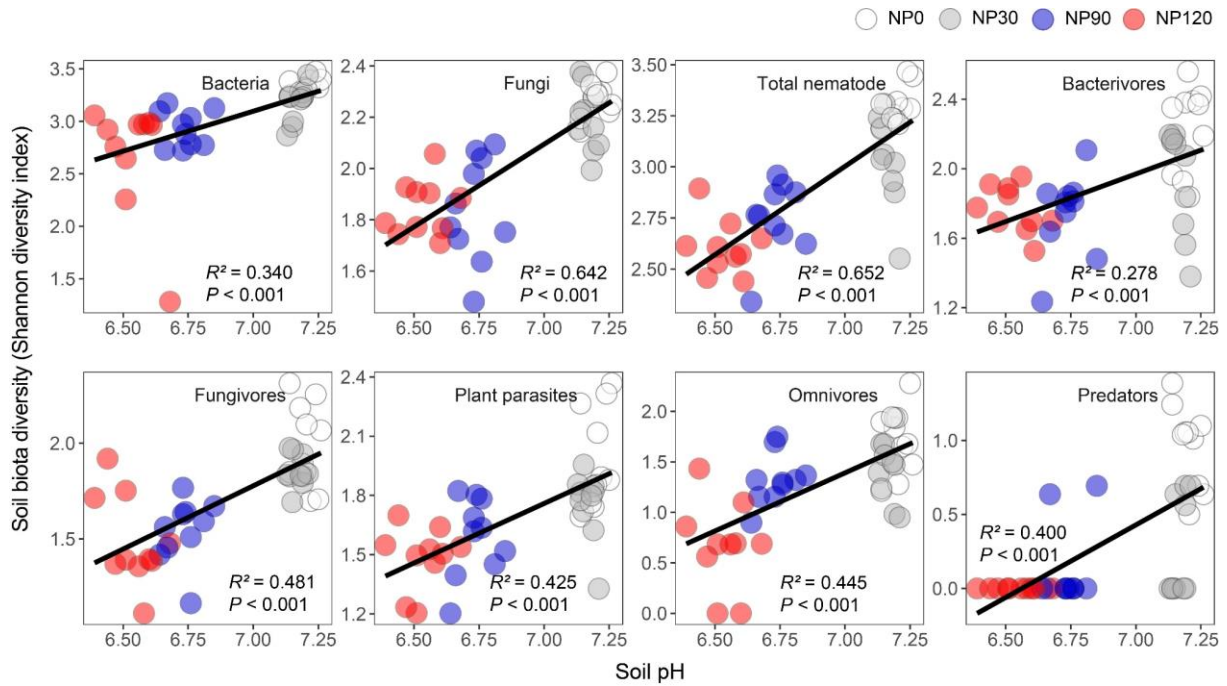

**Supplementary Fig. 9 Relationships between soil pH and the diversity of soil biota as influenced by nutrient enrichment.** Linear regression model with two-sided test was used for the statistical analysis, and multiple R-squared was used. Relationships are denoted with solid lines and fit statistics ( $R^2$  and  $P$  values). The solid line represents the significant linear regression ( $P < 0.05$ ).  $n = 40$  independent soil samples for regression model. Source data are provided as a Source Data file.

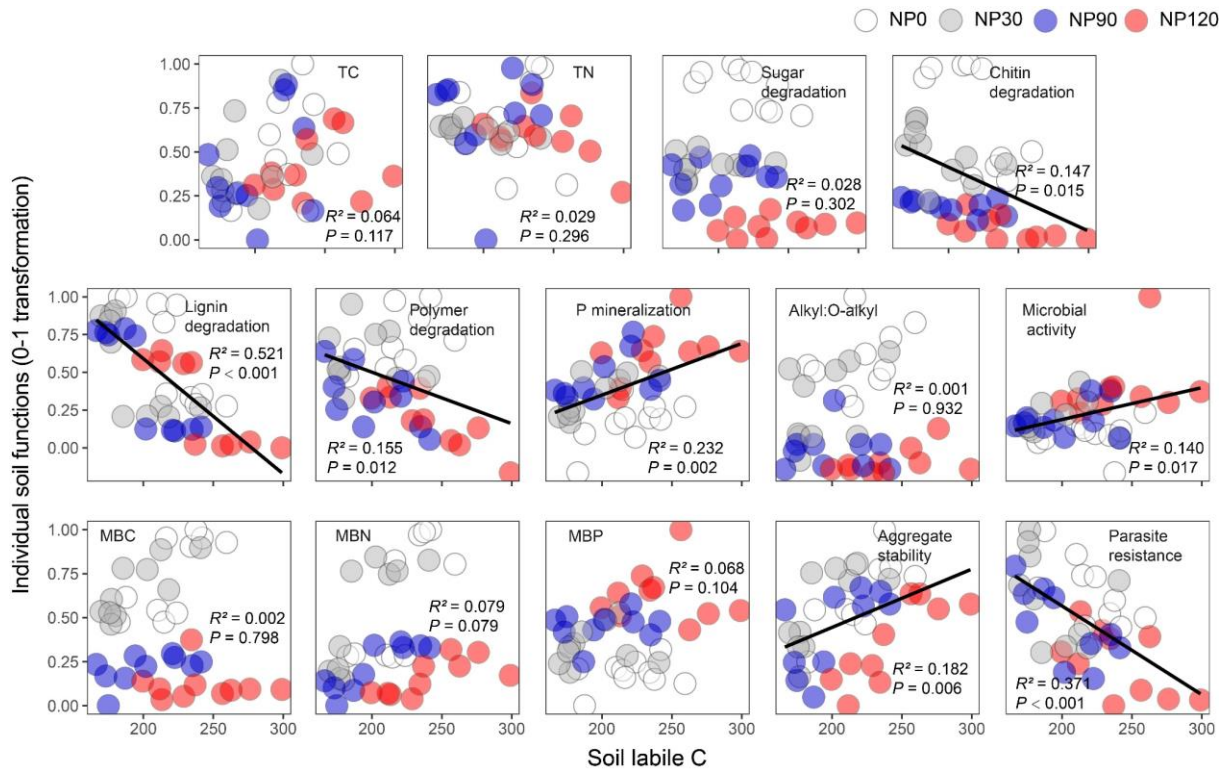

**Supplementary Fig. 10 Relationships between soil labile C and individual soil functions as influenced by nutrient enrichment.** Linear regression model with two-sided test was used for the statistical analysis, and multiple R-squared was used. Relationships are denoted with solid lines and fit statistics ( $R^2$  and  $P$  values). The solid line represents the significant linear regression ( $P < 0.05$ ).  $n = 40$  independent soil samples for regression model. TC, total soil carbon; TN, total soil nitrogen; MBC, microbial biomass carbon; MBN, microbial biomass nitrogen; MBP, microbial biomass phosphorus. Source data are provided as a Source Data file.

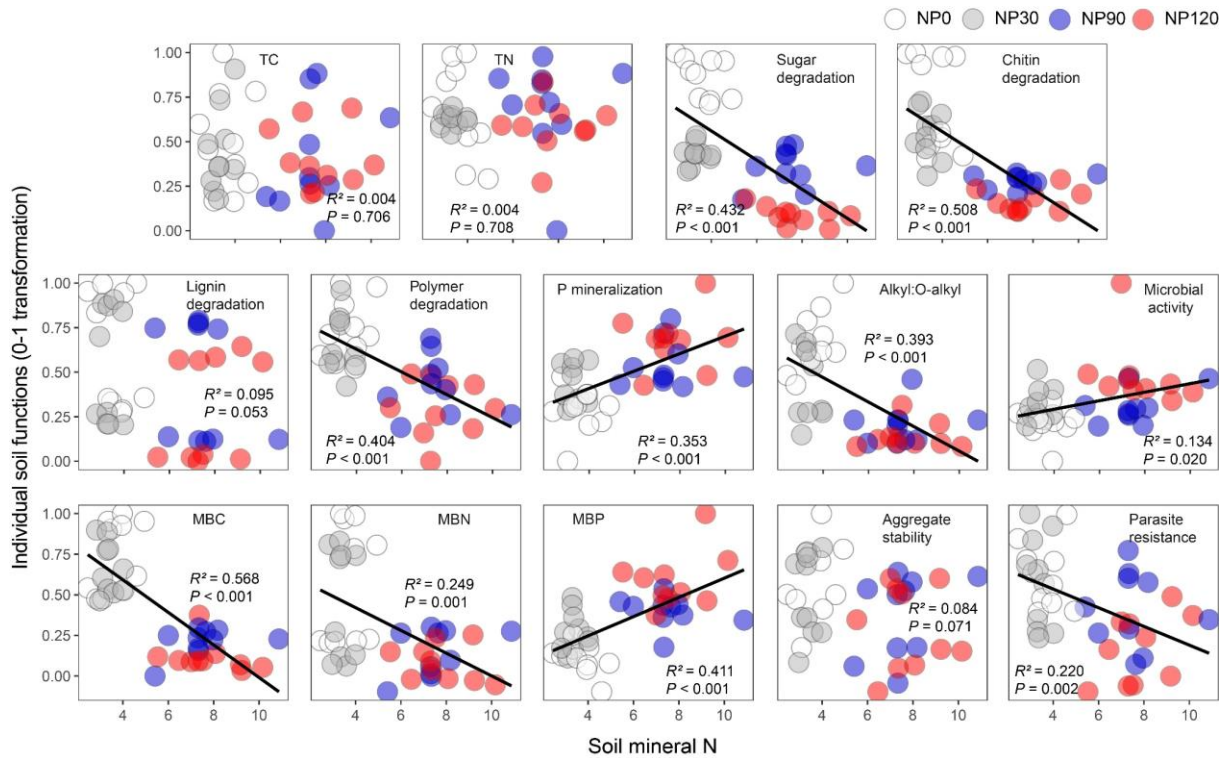

**Supplementary Fig. 11 Relationships between soil mineral N and individual soil functions as influenced by nutrient enrichment.** Linear regression model with two-sided test was used for the statistical analysis, and multiple R-squared was used. Relationships are denoted with solid lines and fit statistics ( $R^2$  and  $P$  values). The solid line represents the significant linear regression ( $P < 0.05$ ).  $n = 40$  independent soil samples for regression model. TC, total soil carbon; TN, total soil nitrogen; MBC, microbial biomass carbon; MBN, microbial biomass nitrogen; MBP, microbial biomass phosphorus. Source data are provided as a Source Data file.

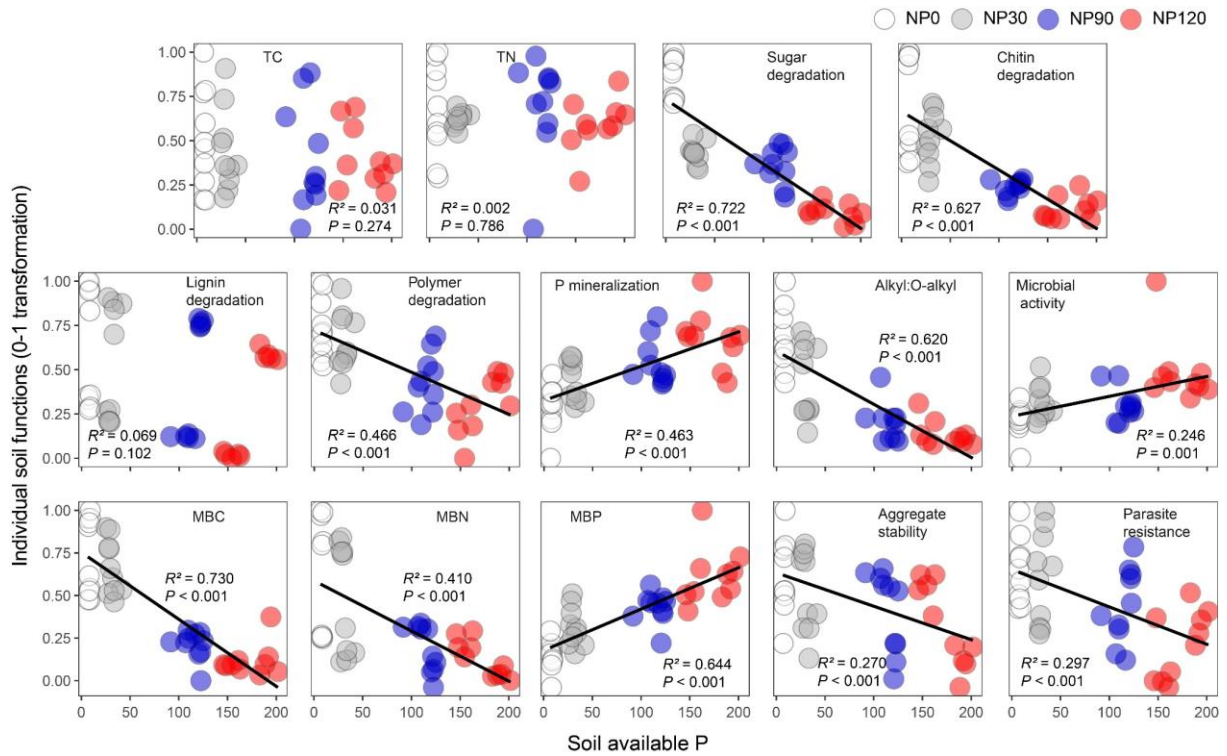

**Supplementary Fig. 12 Relationships between soil available P and individual soil functions as influenced by nutrient enrichment.** Linear regression model with two-sided test was used for the statistical analysis, and multiple R-squared was used. Relationships are denoted with solid lines and fit statistics ( $R^2$  and  $P$  values). The solid line represents the significant linear regression ( $P < 0.05$ ).  $n = 40$  independent soil samples for regression model. TC, total soil carbon; TN, total soil nitrogen; MBC, microbial biomass carbon; MBN, microbial biomass nitrogen; MBP, microbial biomass phosphorus. Source data are provided as a Source Data file.

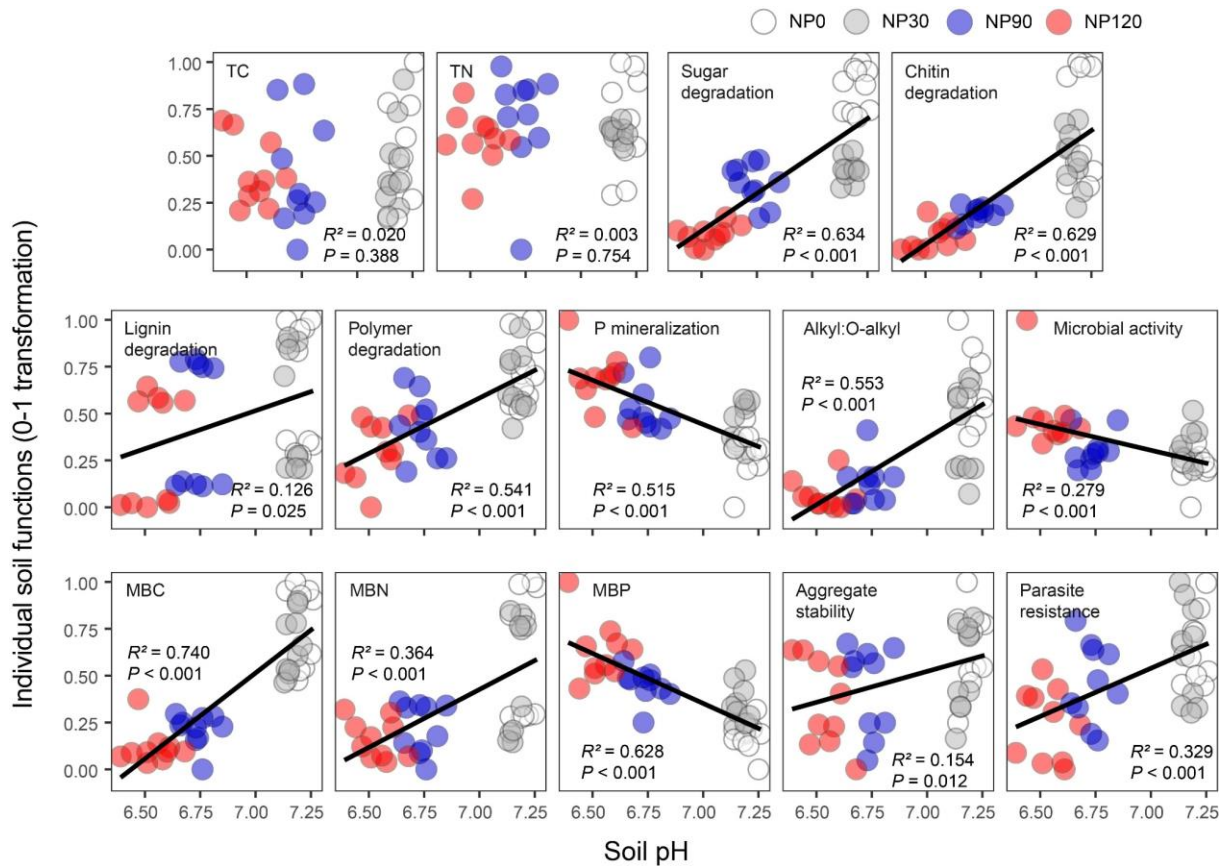

**Supplementary Fig. 13 Relationships between soil pH and individual soil functions as influenced by nutrient enrichment.** Linear regression model with two-sided test was used for the statistical analysis, and multiple R-squared was used. Relationships are denoted with solid lines and fit statistics ( $R^2$  and  $P$  values). The solid line represents the significant linear regression ( $P < 0.05$ ).  $n = 40$  independent soil samples for regression model. TC, total soil carbon; TN, total soil nitrogen; MBC, microbial biomass carbon; MBN, microbial biomass nitrogen; MBP, microbial biomass phosphorus. Source data are provided as a Source Data file.

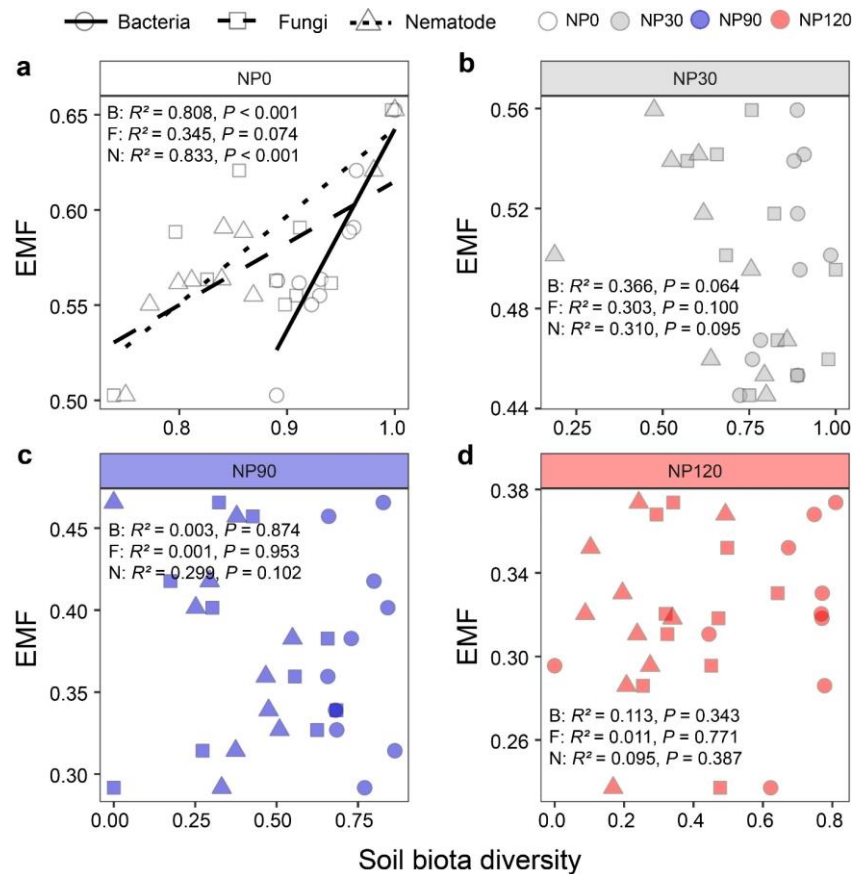

**Supplementary Fig. 14 Nutrient enrichment weakened the relationship between the diversity of single soil biota group and EMF at all three nutrient addition levels.** The fitted linear relationships between soil biodiversity and EMF under **a** NP0, **b** NP30, **c** NP90, **d** NP120. Linear regression model with two-sided test was used for the statistical analysis, and multiple R-squared was used. Relationships are denoted with solid lines and fit statistics ( $R^2$  and  $P$  values). The solid line represents the significant linear regression ( $P < 0.05$ ).  $n = 10$  independent soil samples for regression model. B: bacteria; F: Fungi; N: nematode. Source data are provided as a Source Data file.



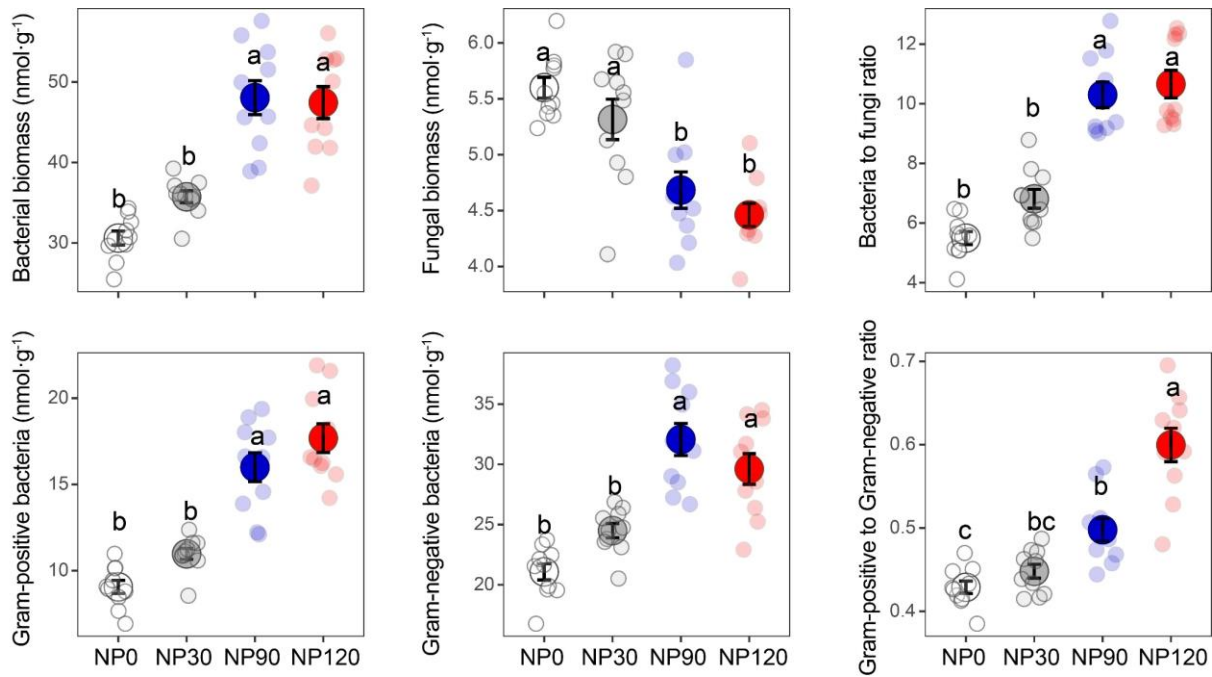

**Supplementary Fig. 15 Effects of nutrient enrichment on microbial community structure.**

Microbial biomass was measured by phospholipid fatty acid analysis<sup>1</sup>. Briefly, lipid was extracted from 8.0 g freeze-dried soil with a chloroform–methanol–citrate buffer mixture (25ml at a 1:2:0.8 v/v), and the phospholipids were transesterified to a mild alkaline methanolysis. The resulting fatty acid methyl esters were extracted in hexane and dried under N<sub>2</sub> and were then dissolved in hexane and analyzed in an Agilent 6850 series gas chromatograph with MIDI peak identification software (v.4.5; MIDI Inc., Newark, DE, USA). The fatty acids i14:0, i15:0, a15:0, i16:0, 16:1 $\omega$ 7c, i17:0, a17:0, 17:0cy, 18:1 $\omega$ 9, 18:1 $\omega$ 7c, and 19:0cy were chosen as bacterial markers; 18:1 $\omega$ 9c and 18:2 $\omega$ 6.9c were used as fungal markers. Dots with bars indicate Mean  $\pm$  standard error (SE) (n = 10 independent soil samples per treatment), and jittered points represent biologically independent samples for each treatment. Data were analyzed using one-way ANOVA. Based on two-sided tests for multiple comparisons (Fisher's least significant difference), means with different lowercase letters indicate significant difference among treatments ( $P < 0.05$ ). Source data are provided as a Source Data file.

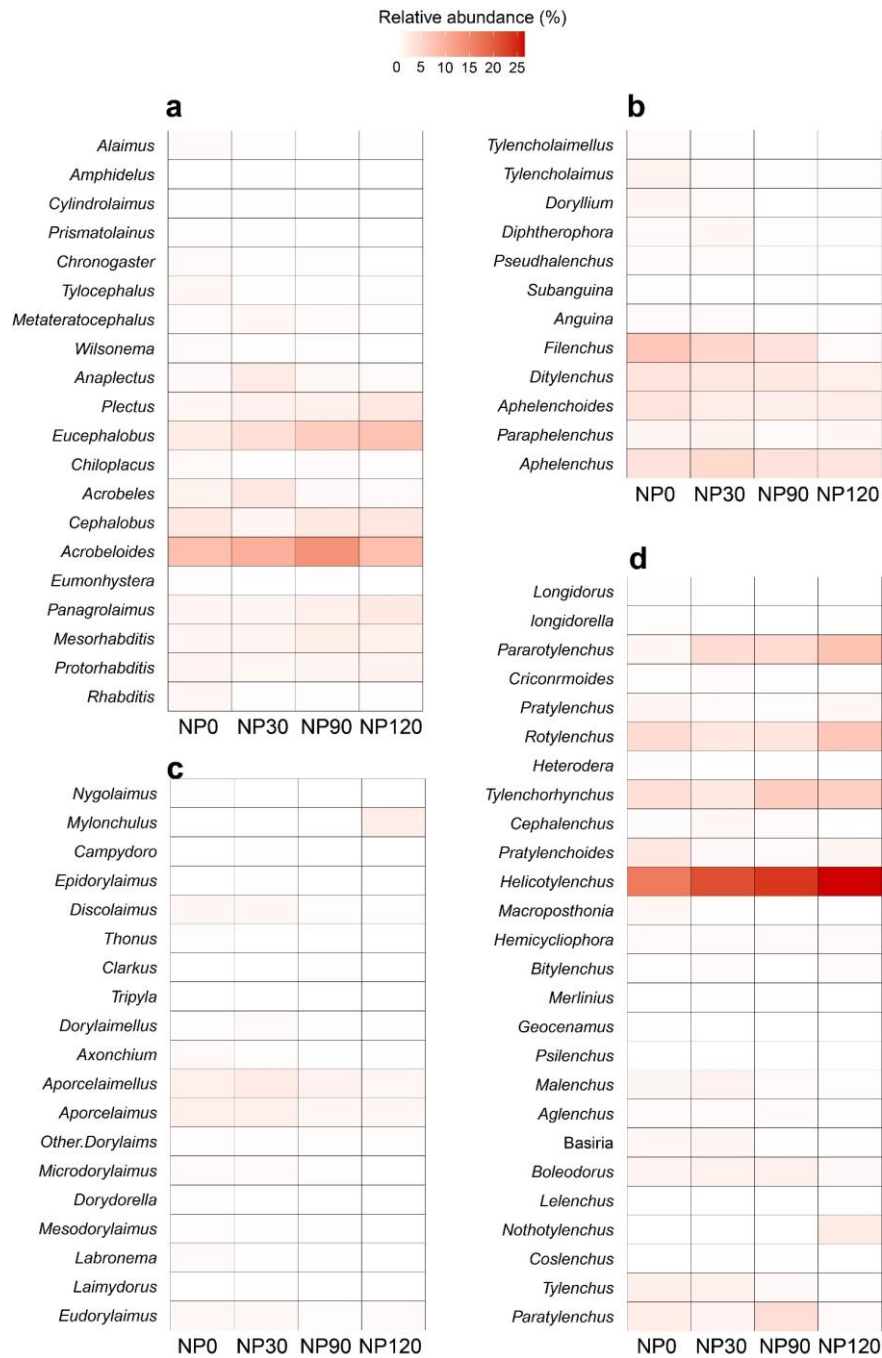

**Supplementary Fig. 16 Effects of nutrient enrichment on the relative abundance of nematode genera. a** Relative abundance of bacterivores. **b** relative abundance of fungivores. **c** Relative abundance of omnivores and predators. **d** Relative abundance of herbivores.  $n = 10$  independent soil samples for regression model. Source data are provided as a Source Data file.

**Supplementary Table 1** The individual ecosystem functions used for calculating ecosystem multifunctionality in the field and microcosm experiment.

| <b>Ecosystem functions</b> | <b>Units</b> | <b>Description</b>                                                                                                                                                 |
|----------------------------|--------------|--------------------------------------------------------------------------------------------------------------------------------------------------------------------|
| Total soil C               | g/kg         | SOC usually interacts with many biotic and abiotic components of ecosystems and plays important role in regulating climate                                         |
| Total soil N               | g/kg         | Build-up of nutrient pools that most frequently limit the primary production in diverse ecosystems                                                                 |
| Sugar degradation          | nmol/g h     |                                                                                                                                                                    |
| Chitin degradation         | nmol/g h     |                                                                                                                                                                    |
| Lignin degradation         | nmol/g h     | Indicator of the activity of the microbial community and its capacity to drive organic matter decomposition in terrestrial ecosystem <sup>2,3</sup>                |
| Polymer degradation        | mg/kg        |                                                                                                                                                                    |
| P mineralization           | nmol/g h     |                                                                                                                                                                    |
| alkyl:o-alkyl              | unitless     | Indicator of OM quality and microbial processing, with higher ratios indicating losses of more labile C relative to more stable C compounds <sup>4,5</sup>         |
| Microbial activity         | mg C/kg      | A measure of the potential activity of the component of the microbial community that is responsible for driving decomposition and related processes <sup>6,7</sup> |
| MBC                        | mg/kg        | Early indicator of changes in soil chemical and physical properties;                                                                                               |
| MBN                        | mg/kg        | the most labile C, N, and P pools in soil affecting nutrient availability and plant productivity <sup>3,8</sup>                                                    |
| MBP                        | mg/kg        |                                                                                                                                                                    |
| Aggregate stability        | mm           | Indicator of soil structure influencing storage of water, aeration, erosion, biological activity and the growth of crops <sup>9,10</sup>                           |
| Resistance to parasites    | unitless     | Reduced relative abundance of plant parasitic nematode; Indicator of the capacity of soil systems to resistant plant parasites <sup>11-13</sup>                    |

## Supplementary Code. Code for all analyses

### 1. code for analyses in the main text

#### *#Figure1 Effects of nutrient enrichment on soil physicochemical properties*

##### *#Anova*

```
library(psych)
library(agricolae)
setwd("D:/Submission/8-Fertilization-EMF/NC-revision/Final/data")
EMF<-read.csv(file="Rawdata.csv")
myaov=aov(LabileC~Treatment,data=EMF) #"LabileC, MineralN, AvailableP, pH"
summary(myaov)
LSD.test(myaov,"Treatment", p.adj="bonferroni", console=T)
```

##### *#Figure*

```
library(Rmisc)
library(ggplot2)
library(reshape2)
setwd("D:/Submission/8-Fertilization-EMF/NC-revision/Final/data")
EMF<-read.csv(file="Rawdata.csv")
EMF<-melt(EMF,id.vars=1:6, measure.vars = c(9,7,8,10),
          variable.name = "Function", value.name = "value")
myhisto<-summarySE(EMF, measurevar="value",groupvars=c("Function","Treatment"))
myhisto$Treatment<-factor(myhisto$Treatment,levels=c("NP0","NP30","NP90","NP120"))
ggplot(myhisto, aes(x=Treatment, y=value,fill=Treatment,colour=Treatment))+
  geom_point(position=position_dodge(0.8),stat="identity",size=6, shape=21)+
  geom_errorbar(aes(ymin=value-
se,ymax=value+se),width=0.2,colour="black",position=position_dodge(0.8),size=0.8)+
  geom_jitter(data=EMF,aes(fill=Treatment),position=position_jitter(0.2),shape=21, size=3, alpha=0.2)+
  facet_wrap(~Function,scales="free",nrow = 2)+ #,nrow = 4
  theme_bw()+
  theme(panel.background = element_blank(),
        panel.grid.major = element_blank(),
        panel.grid.minor = element_blank(),plot.background = element_blank(),
        axis.text.x = element_text(size=12,colour="black", angle = 0, hjust = 0.5),
        axis.text.y = element_text(size = 10)) +
  scale_colour_manual(values=c("grey30","grey30","navy","tomato4"))+
  scale_fill_manual(values=c("white","grey70","blue3","red"))
```

#### *####Figure 2 Relationships between soil physicochemical properties and soil multidiversity as influenced by nutrient enrichment*

##### *#Regression*

```
setwd("D:/Submission/8-Fertilization-EMF/NC-revision/Final/data")
EMF<-read.csv(file="Rawdata.csv")
x<-EMF[,c("LabileC")] #"LabileC, MineralN, AvailableP, pH"
y<-EMF[,c("Multidiversity")]
cor.test(x,y,method = "pearson")
test=lm(y~x)
test
summary(test)
```

##### *#Figure*

```
library(Rmisc)
library(ggplot2)
library(reshape2)
setwd("D:/Submission/8-Fertilization-EMF/NC-revision/Final/data")
EMF<-read.csv(file="Rawdata.csv")
```

```

EMF<-melt(EMF,id.vars=c(1:6,23,55,48), measure.vars = c(9,7,8,10),
          variable.name = "Function", value.name = "value")
EMF$Treatment<-factor(EMF$Treatment,levels=c("NP0","NP30","NP90","NP120"))
p1<-
ggplot(data=EMF,mapping=aes(x=value,y=Multidiversity,shape=Treatment,fill=Treatment,colour=Treatment))
+ #PredatorToPreyB
  geom_point(size=6,alpha=0.5)+
  scale_shape_manual(values = c(21,21,21,21))+
  scale_colour_manual(values = c("grey30","grey30","navy","tomato4"))+
  scale_fill_manual(values = c("white","grey70","blue3","red"))+
  geom_smooth(aes(group=All,linetype=All), color="black",method="lm", size=1.5, se=F)+
  scale_linetype_manual(values=c(1))+
  facet_wrap(~Function,scales="free",nrow = 2)+
  theme_bw()+
  theme(axis.text.x = element_text(size=12, angle = 0, hjust = 0.5),
        axis.text.y = element_text(size = 12),
        axis.title=element_text(size=14,face="bold"),
        axis.ticks.length = unit(0.1,"cm"),
        panel.grid = element_blank(),
        panel.background = element_blank(),
        panel.grid.major = element_blank(),
        panel.grid.minor = element_blank(),plot.background = element_blank())
p1

```

### #### *Figure 3 Relationships between soil prey and predator diversity as influenced by nutrient enrichment*

#### *#Regression*

```

setwd("D:/Submission/8-Fertilization-EMF/NC-revision/Final/data")
EMF<-read.csv(file="Rawdata.csv")
x<-EMF[,c("Microbialdiversity")] #"Preydiversity"
y<-EMF[,c("Microbivorediversity")] #"Predatordiversity"
cor.test(x,y,method = "pearson")
test=lm(y~x)
test
summary(test)

```

#### *#Figures*

```

library(Rmisc)
library(ggplot2)
library(reshape2)
setwd("D:/Submission/8-Fertilization-EMF/NC-revision/Final/data")
EMF<-read.csv(file="Rawdata.csv")
EMF$Treatment<-factor(EMF$Treatment,levels=c("NP0","NP30","NP90","NP120"))
p1<-
ggplot(data=EMF,mapping=aes(x=Microbialdiversity,y=Microbivorediversity,shape=Treatment,fill=Treatment,colour=Treatment))
+ #PredatorToPreyB
  geom_point(size=6,alpha=0.5)+
  scale_shape_manual(values = c(21,21,21,21))+
  scale_colour_manual(values = c("grey30","grey30","navy","tomato4"))+
  scale_fill_manual(values = c("white","grey70","blue3","red"))+
  geom_smooth(aes(group=All,linetype=All), color="black",method="lm", size=1.5, se=F)+
  scale_linetype_manual(values=c(1))+

  theme_bw()+
  theme(axis.text.x = element_text(size=12, angle = 0, hjust = 0.5),
        axis.text.y = element_text(size = 12),
        axis.title=element_text(size=14,face="bold"),

```

```

axis.ticks.length = unit(0.1, "cm"),
panel.grid = element_blank(),
panel.background = element_blank(),
panel.grid.major = element_blank(),
panel.grid.minor = element_blank(), plot.background = element_blank()
p1

p2<-
ggplot(data=EMF,mapping=aes(x=Preydiversity,y=Predatordiversity,shape=Treatment,fill=Treatment,colou
r=Treatment))+ #PredatorToPreyB
  geom_point(size=6,alpha=0.5)+
  scale_shape_manual(values = c(21,21,21,21))+
  scale_colour_manual(values = c("grey30","grey30","navy","tomato4"))+
  scale_fill_manual(values = c("white","grey70","blue3","red"))+
  geom_smooth(aes(group=All,linetype=All), color="black",method="lm", size=1.5, se=F)+
  scale_linetype_manual(values=c(1))+

  theme_bw()+
  theme(axis.text.x = element_text(size=12, angle = 0, hjust = 0.5),
        axis.text.y = element_text(size = 12),
        axis.title=element_text(size=14,face="bold"),
        axis.ticks.length = unit(0.1, "cm"),
        panel.grid = element_blank(),
        panel.background = element_blank(),
        panel.grid.major = element_blank(),
        panel.grid.minor = element_blank(), plot.background = element_blank())
p2

library(cowplot)
p3 <- plot_grid( p1, p2, nrow = 1, align = "v", labels = letters[1:2])
p3

####Figure 4 Relationships between soil physicochemical properties and soil multidiversity as influenced
by nutrient enrichment
#Regression
setwd("D:/Submission/8-Fertilization-EMF/NC-revision/Final/data")
EMF<-read.csv(file="Rawdata.csv")
x<-EMF[,c("AvailableP")] #LabileC, MineralN, AvailableP, pH"
y<-EMF[,c("Multifunction")]
cor.test(x,y,method = "pearson")
test=lm(y~x)
test
summary(test)

#Figure
library(Rmisc)
library(ggplot2)
library(reshape2)
setwd("D:/Submission/8-Fertilization-EMF/NC-revision/Final/data")
EMF<-read.csv(file="Rawdata.csv")
EMF<-melt(EMF,id.vars=c(1:6,23,44,48), measure.vars = c(9,7,8,10),
          variable.name = "Function", value.name = "value")
EMF$Treatment<-factor(EMF$Treatment,levels=c("NP0","NP30","NP90","NP120"))
p1<-
ggplot(data=EMF,mapping=aes(x=value,y=Multifunction,shape=Treatment,fill=Treatment,colour=Treatme
nt))+ #PredatorToPreyB

```

```

geom_point(size=6,alpha=0.5)+
scale_shape_manual(values = c(21,21,21,21))+
scale_colour_manual(values =c("grey30","grey30","navy","tomato4"))+
scale_fill_manual(values = c("white","grey70","blue3","red"))+
geom_smooth(aes(group=All,linetype=All), color="black",method="lm", size=1.5, se=F)+
scale_linetype_manual(values=c(1))+
facet_wrap(~Function,scales="free",nrow = 2)+
theme_bw()+
theme(axis.text.x = element_text(size=12, angle = 0, hjust = 0.5),
      axis.text.y = element_text(size = 12),
      axis.title=element_text(size=14,face="bold"),
      axis.ticks.length = unit(0.1,"cm"),
      panel.grid = element_blank(),
      panel.background = element_blank(),
      panel.grid.major = element_blank(),
      panel.grid.minor = element_blank(),plot.background = element_blank())

```

p1

#### ####*Figure 5 Relationships between soil biodiversity and soil functions or ecosystem multifunctionality*

*#correlation analysis*

*#Figure5a*

```

library(corrplot)
setwd("D:/Submission/8-Fertilization-EMF/NC-revision/Final/data")
EMF<-read.csv(file="Rawdata.csv")
x<-EMF[,c(54:61)]
y<-EMF[,c(62:75)]
matrix<-cor(y,x,use="everything",method= c("spearman")) #"kendall","spearman"
res1 <- cor.mtest(matrix, conf.level = .95)
corrplot(corr=matrix,method = "square",tl.col = "black"
         ,tl.pos = "lt")

```

*#Relationship between soil biota diversity and EMF*

```

setwd("D:/Submission/8-Fertilization-EMF/NC-revision/Final/data")
EMF<-read.csv(file="Rawdata.csv")
x<-EMF[,c("Bacterialdiversity1")] #"Fungaldiversity1", Nematodediversity1, BFdiversity1,
FFdiversity1,PFdiversity1,OMdiversity1,PRdiversity1 "
y<-EMF[,c("Multifunction")]
cor.test(x,y,method = "pearson")
test=lm(y~x)
test
summary(test)

```

*#Figure5b*

```

library(Rmisc)
library(ggplot2)
library(reshape2)
library(ggsci)
setwd("D:/Submission/8-Fertilization-EMF/NC-revision/Final/data")
EMF<-read.csv(file="Rawdata.csv")
Diversity<-melt(EMF,id.vars=c(1:6,44,23,48), measure.vars = c(54:61,23),
              variable.name = "Biota", value.name = "value")

p1<-ggplot(data=Diversity,mapping=aes(x=value,y=Multifunction,shape=All,fill=Biota),colour=Biota)+
  geom_smooth(aes(group=Biota,linetype=Biota,color=Biota), method="lm", size=1.5, se=F)+
  scale_linetype_manual(values=c(1,1,1,1,1,1,1,2))+
  theme_bw()+

```

```

theme(axis.text.x = element_text(size=12,colour="black", angle = 0, hjust = 0.5),
      axis.text.y = element_text(size = 12,colour="black"),
      axis.title=element_text(size=14,face="bold"),
      axis.ticks.length = unit(0.1,"cm"),
      panel.spacing.x = unit(10, 'mm'),
      panel.grid = element_blank(),
      panel.background = element_blank(),
      panel.grid.major = element_blank(),
      panel.grid.minor = element_blank(),plot.background = element_blank())
plot(p1)
p2<-p1+scale_fill_npg()+scale_color_npg()
p2

```

### #Relationships between multidiversity and multi-threshold EMF

#### #correlation

```
setwd("D:/Submission/8-Fertilization-EMF/NC-revision/Final/data")
```

```
EMF<-read.csv(file="Rawdata.csv")
```

```
x<-EMF[,c("Multidiversity")]
```

```
#"Fungaldiversity1, Nematodediversity1,
```

```
BFdiversity1,
```

```
#FFdiversity1,PFdiversity1,OMdiversity1,PRdiversity1"
```

```
y<-EMF[,c("EMF3")] #"EMF5,EMF7"
```

```
cor.test(x,y,method = "pearson")
```

```
test=lm(y~x)
```

```
test
```

```
summary(test)
```

#### #Figure5c

```
library(Rmisc)
```

```
library(ggplot2)
```

```
library(reshape2)
```

```
library(ggsci)
```

```
setwd("D:/Submission/8-Fertilization-EMF/NC-revision/Final/data")
```

```
EMF<-read.csv(file="Rawdata.csv")
```

```
Diversity<-melt(EMF,id.vars=c(1:6,23,48), measure.vars = 45:47,
               variable.name = "Biota", value.name = "value")
```

```

p3<-ggplot(data=Diversity,mapping=aes(x=Multidiversity,y=value,shape=All,fill=Biota),colour=Biota)+
  geom_smooth(aes(group=Biota,linetype=Biota,color=Biota), method="lm", size=1.5, se=F)+
  scale_linetype_manual(values=c(1,1,1,1,1,1,1,1,2))+
  theme_bw()+

```

```

  theme(axis.text.x = element_text(size=12,colour="black", angle = 0, hjust = 0.5),

```

```

        axis.text.y = element_text(size = 12,colour="black"),

```

```

        axis.title=element_text(size=14,face="bold"),

```

```

        axis.ticks.length = unit(0.1,"cm"),

```

```

        panel.spacing.x = unit(10, 'mm'),

```

```

        panel.grid = element_blank(),

```

```

        panel.background = element_blank(),

```

```

        panel.grid.major = element_blank(),

```

```

        panel.grid.minor = element_blank(),plot.background = element_blank())

```

```
plot(p3)
```

```
p4<-p3+scale_fill_npg()+scale_color_npg()
```

```
p4
```

### ####Figure 6 Nutrient enrichment weakened the diversity-function linkage at all three nutrient addition levels

#### #Regression

#### #Figure

```
library(Rmisc)
```



```

library(ggplot2)
library(reshape2)
library(ggsci)
setwd("D:/Submission/8-Fertilization-EMF/NC-revision/Final/data")
pHBD<-read.csv(file="Rawdata.csv")
pHBD1<-melt(pHBD,id.vars=c(1:6,23,48), measure.vars = 44:44,
            variable.name = "Function", value.name = "value")
pHBD1$Treatment<-factor(pHBD1$Treatment,levels=c("NP0","NP30","NP90","NP120"))
p1<-
ggplot(data=pHBD1,mapping=aes(x=Multidiversity,y=value,shape=Treatment,fill=Treatment,colour=Treatment))+
  geom_point(size=6,alpha=0.5)+
  scale_shape_manual(values = c(21,21,21,21))+
  scale_colour_manual(values = c("grey30","grey30","navy","tomato4"))+
  scale_fill_manual(values = c("white","grey70","blue3","red"))+
  geom_smooth(aes(group=Function,linetype=Function,color=Treatment), method="lm", size=1.5, se=F)+
  scale_linetype_manual(values=c(1,1,1,1))+
  ggpubr::stat_cor(aes(color = Treatment), r.digits = 2,p.digits = 2)+
  facet_wrap(~Treatment,scales="free",nrow = 2)+
  theme_bw()+
  theme(axis.text.x = element_text(size=12, angle = 0, hjust = 0.5),
        axis.text.y = element_text(size = 12),
        axis.title=element_text(size=14,face="bold"),
        axis.ticks.length = unit(0.1,"cm"),
        panel.grid = element_blank(),
        panel.background = element_blank(),
        panel.grid.major = element_blank(),
        panel.grid.minor = element_blank(),plot.background = element_blank())
plot(p1)

```

#### ####Figure 7 Piecewise SEM

#full model

#Figure7

library(lme4)

library(piecewiseSEM)

setwd("D:/Submission/8-Fertilization-EMF/NC-revision/Final/data")

pSEM<-read.csv(file="Rawdata.csv")

pSEM\_model<-psem(

  lmer(LabileC1~NP+(1|Block)+(1|Year),data=pSEM),

  lmer(MineralN1~NP+(1|Block)+(1|Year),data=pSEM),

  lmer(pH1~NP+(1|Block)+(1|Year),data=pSEM),

  lmer(Microbialdiversity~pH1+LabileC1+MineralN1+(1|Block)+(1|Year),data=pSEM),

  lmer(Nematodediversity1~pH1+LabileC1+MineralN1+Microbialdiversity+(1|Block)+(1|Year),data=pSEM),

  lmer(Multifunction~pH1+LabileC1+MineralN1+Microbialdiversity+Nematodediversity1+(1|Block)+(1|Year),data=pSEM),

  data=pSEM

)

summary(pSEM\_model)

plot(pSEM\_model)

#final model

pSEM\_model<-psem(

  lmer(LabileC1~NP+(1|Block)+(1|Year),data=pSEM),

```

lmer(MineralN1~NP+(1|Block)+(1|Year),data=pSEM),
lmer(pH1~NP+(1|Block)+(1|Year),data=pSEM),
lmer(Microbialdiversity~pH1+(1|Block)+(1|Year),data=pSEM),
lmer(Nematodediversity1~pH1+Microbialdiversity+(1|Block)+(1|Year),data=pSEM),
lmer(Multifunction~Microbialdiversity+Nematodediversity1+(1|Block)+(1|Year),data=pSEM),
NP%~%Microbialdiversity,
NP%~%Nematodediversity1,
NP%~%Multifunction,
data=pSEM
)
summary(pSEM_model)
plot(pSEM_model)

```

```
#####
```

---



---

## 2. R code for supplementary information

*#Figure S1 is a conceptual model and does not include any data.*

*#Figure S2 Effects of nutrient enrichment on the diversity of soil organisms.*

*#Anova*

```

library(psych)
library(agricolae)

```

```

setwd("D:/Submission/8-Fertilization-EMF/NC-revision/Final/data")
EMF<-read.csv(file="Rawdata.csv")
myaov=aov(Fungaldiversity~Treatment,data=EMF)
#"Bacterialdiversity,Fungaldiversity,Nematodediversity,BFdiversity
#,FFdiversity,PFdiversity,OMdiversity,PRdiversity"
summary(myaov)
LSD.test(myaov,"Treatment", p.adj="bonferroni", console=T)

```

*#Figure*

```

library(Rmisc)
library(ggplot2)
library(reshape2)

```

```

setwd("D:/Submission/8-Fertilization-EMF/NC-revision/Final/data")
EMF<-read.csv(file="Rawdata.csv")
EMF<-melt(EMF,id.vars=1:6, measure.vars = 11:18,
          variable.name = "Function", value.name = "value")
myhisto<-summarySE(EMF, measurevar="value",groupvars=c("Function","Treatment"))
myhisto$Treatment<-factor(myhisto$Treatment,levels=c("NP0","NP30","NP90","NP120"))
ggplot(myhisto, aes(x=Treatment, y=value,fill=Treatment,colour=Treatment))+
  geom_point(position=position_dodge(0.8),stat="identity",size=6, shape=21)+
  geom_errorbar(aes(ymin=value-
se,ymax=value+se),width=0.2,colour="black",position=position_dodge(0.8),size=0.8)+
  geom_jitter(data=EMF,aes(fill=Treatment),position=position_jitter(0.2),shape=21, size=3, alpha=0.2)+
  facet_wrap(~Function,scales="free",nrow = 2)+ #,nrow = 4
  theme_bw()+
  theme(panel.background = element_blank(),
        panel.grid.major = element_blank(),
        panel.grid.minor = element_blank(),plot.background = element_blank(),
        axis.text.x = element_text(size=12,colour="black", angle = 0, hjust = 0.5),
        axis.text.y = element_text(size = 10)) +
  scale_colour_manual(values=c("grey30","grey30","navy","tomato4"))+
  scale_fill_manual(values=c("white","grey70","blue3","red"))

```

### *#Figure S3 Effects of nutrient enrichment on soil multidiversity index.*

#### *#Anova*

```
setwd("D:/Submission/8-Fertilization-EMF/NC-revision/Final/data")
EMF<-read.csv(file="Rawdata.csv")
myaov=aov(Multidiversity~Treatment,data=EMF)
summary(myaov)
LSD.test(myaov,"Treatment", p.adj="bonferroni", console=T)
```

#### *#Figure*

```
library(Rmisc)
library(ggplot2)
library(reshape2)

setwd("D:/Submission/8-Fertilization-EMF/NC-revision/Final/data")
EMF<-read.csv(file="Rawdata.csv")
EMF<-melt(EMF,id.vars=1:6, measure.vars = 23:23,
          variable.name = "Function", value.name = "value")
myhisto<-summarySE(EMF, measurevar="value",groupvars=c("Function","Treatment"))
myhisto$Treatment<-factor(myhisto$Treatment,levels=c("NP0","NP30","NP90","NP120"))
ggplot(myhisto, aes(x=Treatment, y=value,fill=Treatment,colour=Treatment))+
  geom_point(position=position_dodge(0.8),stat="identity",size=6, shape=21)+
  geom_errorbar(aes(ymin=value-
se,ymax=value+se),width=0.2,colour="black",position=position_dodge(0.8),size=0.8)+
  geom_jitter(data=EMF,aes(fill=Treatment),position=position_jitter(0.2),shape=21, size=3, alpha=0.2)+
  facet_wrap(~Function,scales="free",nrow = 2)+ #,nrow = 4
  theme_bw()+
  theme(panel.background = element_blank(),
        panel.grid.major = element_blank(),
        panel.grid.minor = element_blank(),plot.background = element_blank(),
        axis.text.x = element_text(size=12,colour="black", angle = 0, hjust = 0.5),
        axis.text.y = element_text(size = 10)) +
  scale_colour_manual(values=c("grey30","grey30","navy","tomato4"))+
  scale_fill_manual(values=c("white","grey70","blue3","red"))
```

### *#Figure S4 Effects of nutrient enrichment on soil individual functions.*

#### *#Anova*

```
setwd("D:/Submission/8-Fertilization-EMF/NC-revision/Final/data")
EMF<-read.csv(file="Rawdata.csv")
myaov=aov(SOCStorage~Treatment,data=EMF)
#SOCStorage,Nstorage,Sugardegradation,Chitindegredation,Lignindegredation,
#Polymerdegredation,Pmineralization,SOCdecompositionpotential,Microbialactivity,MBC,MBN,#MBP,Ag
gregatestability,Parasiteresistance
summary(myaov)
LSD.test(myaov,"Treatment", p.adj="bonferroni", console=T)
```

#### *#Figure*

```
library(Rmisc)
library(ggplot2)
library(reshape2)

setwd("D:/Submission/8-Fertilization-EMF/NC-revision/Final/data")
EMF<-read.csv(file="Rawdata.csv")
EMF<-melt(EMF,id.vars=1:6, measure.vars = 30:43,
          variable.name = "Function", value.name = "value")
myhisto<-summarySE(EMF, measurevar="value",groupvars=c("Function","Treatment"))
myhisto$Treatment<-factor(myhisto$Treatment,levels=c("NP0","NP30","NP90","NP120"))
```

```

ggplot(myhisto, aes(x=Treatment, y=value, fill=Treatment, colour=Treatment))+
  geom_point(position=position_dodge(0.8), stat="identity", size=6, shape=21)+
  geom_errorbar(aes(ymin=value-
se, ymax=value+se), width=0.2, colour="black", position=position_dodge(0.8), size=0.8)+
  geom_jitter(data=EMF, aes(fill=Treatment), position=position_jitter(0.2), shape=21, size=3, alpha=0.2)+
  facet_wrap(~Function, scales="free", nrow = 3)+ #, nrow = 4
  theme_bw()+
  theme(panel.background = element_blank(),
        panel.grid.major = element_blank(),
        panel.grid.minor = element_blank(), plot.background = element_blank(),
        axis.text.x = element_text(size=12, colour="black", angle = 0, hjust = 0.5),
        axis.text.y = element_text(size = 10)) +
  scale_colour_manual(values=c("grey30", "grey30", "navy", "tomato4"))+
  scale_fill_manual(values=c("white", "grey70", "blue3", "red"))

```

***#Figure S5 Effects of nutrient enrichment on the value of multifunctionality indices and the relationships among EMF indices.***

***#Anova***

```

setwd("D:/Submission/8-Fertilization-EMF/NC-revision/Final/data")
EMF<-read.csv(file="Rawdata.csv")
myaov<-aov(Multifunction~Treatment, data=EMF) #EMF3, EMF5, EMF7
summary(myaov)
LSD.test(myaov, "Treatment", p.adj="bonferroni", console=T)

```

***#Figure***

```

library(Rmisc)
library(ggplot2)
library(reshape2)

```

```

setwd("D:/Submission/8-Fertilization-EMF/NC-revision/Final/data")
EMF<-read.csv(file="Rawdata.csv")
EMF<-melt(EMF, id.vars=1:6, measure.vars = 44:47,
          variable.name = "Function", value.name = "value")
myhisto<-summarySE(EMF, measurevar="value", groupvars=c("Function", "Treatment"))
myhisto$Treatment<-factor(myhisto$Treatment, levels=c("NP0", "NP30", "NP90", "NP120"))
ggplot(myhisto, aes(x=Treatment, y=value, fill=Treatment, colour=Treatment))+
  geom_point(position=position_dodge(0.8), stat="identity", size=6, shape=21)+
  geom_errorbar(aes(ymin=value-
se, ymax=value+se), width=0.2, colour="black", position=position_dodge(0.8), size=0.8)+
  geom_jitter(data=EMF, aes(fill=Treatment), position=position_jitter(0.2), shape=21, size=3, alpha=0.2)+
  facet_wrap(~Function, scales="free", nrow = 2)+ #, nrow = 4
  theme_bw()+
  theme(panel.background = element_blank(),
        panel.grid.major = element_blank(),
        panel.grid.minor = element_blank(), plot.background = element_blank(),
        axis.text.x = element_text(size=12, colour="black", angle = 0, hjust = 0.5),
        axis.text.y = element_text(size = 10)) +
  scale_colour_manual(values=c("grey30", "grey30", "navy", "tomato4"))+
  scale_fill_manual(values=c("white", "grey70", "blue3", "red"))

```

***#Regression***

```

EMF<-read.csv(file="Rawdata.csv")
x<-EMF[,c("Multifunction")]
y<-EMF[,c("EMF3")] #EMF3, EMF5, EMF7
cor.test(x,y, method = "pearson")
test<-lm(y~x)
test

```

```
summary(test)
```

```
#Figure
```

```
EMF<-read.csv(file="Rawdata.csv")
EMF<-melt(EMF,id.vars=c(1:6,23,44,48), measure.vars = c(45,46,47),
         variable.name = "Function", value.name = "value")
EMF$Treatment<-factor(EMF$Treatment,levels=c("NP0","NP30","NP90","NP120"))
p1<-
ggplot(data=EMF,mapping=aes(x=Multifunction,y=value,shape=Treatment,fill=Treatment,colour=Treatment))
+
  geom_point(size=6,alpha=0.5)+
  scale_shape_manual(values = c(21,21,21,21))+
  scale_colour_manual(values = c("grey30","grey30","navy","tomato4"))+
  scale_fill_manual(values = c("white","grey70","blue3","red"))+
  geom_smooth(aes(group=All,linetype=All), color="black",method="lm", size=1.5, se=F)+
  scale_linetype_manual(values=c(1))+
  facet_wrap(~Function,scales="free",nrow = 2)+
  theme_bw()+
  theme(axis.text.x = element_text(size=12, angle = 0, hjust = 0.5),
        axis.text.y = element_text(size = 12),
        axis.title=element_text(size=14,face="bold"),
        axis.ticks.length = unit(0.1,"cm"),
        panel.grid = element_blank(),
        panel.background = element_blank(),
        panel.grid.major = element_blank(),
        panel.grid.minor = element_blank(),plot.background = element_blank())
```

```
p1
```

***#Figure S6 Relationships between soil labile C and the diversity of soil biota as influenced by nutrient enrichment.***

```
#Regression
```

```
EMF<-read.csv(file="Rawdata.csv")
x<-EMF[,c("LabileC")]
y<-EMF[,c("Bacterialdiversity")]
#"Bacterialdiversity,Fungaldiversity,Nematodediversity,BFdiversity,FFdiversity,PFdiversity,
#OMdiversity,PRdiversity"
cor.test(x,y,method = "pearson")
test=lm(y~x)
test
summary(test)
```

```
#Figure
```

```
EMF<-read.csv(file="Rawdata.csv")
EMF<-melt(EMF,id.vars=c(1:10,23,44,48), measure.vars = 11:18,
         variable.name = "Function", value.name = "value")
EMF$Treatment<-factor(EMF$Treatment,levels=c("NP0","NP30","NP90","NP120"))
p1<-
ggplot(data=EMF,mapping=aes(x=LabileC,y=value,shape=Treatment,fill=Treatment,colour=Treatment))
+
  geom_point(size=6,alpha=0.5)+
  scale_shape_manual(values = c(21,21,21,21))+
  scale_colour_manual(values = c("grey30","grey30","navy","tomato4"))+
  scale_fill_manual(values = c("white","grey70","blue3","red"))+
  geom_smooth(aes(group=All,linetype=All), color="black",method="lm", size=1.5, se=F)+
  scale_linetype_manual(values=c(1))+
  facet_wrap(~Function,scales="free",nrow = 2)+
  theme_bw()+
  theme(axis.text.x = element_text(size=12, angle = 0, hjust = 0.5),
```

```

axis.text.y = element_text(size = 12),
axis.title=element_text(size=14,face="bold"),
axis.ticks.length = unit(0.1,"cm"),
panel.grid = element_blank(),
panel.background = element_blank(),
panel.grid.major = element_blank(),
panel.grid.minor = element_blank(),plot.background = element_blank()

```

p1

***#Figure S7 Relationships between soil mineral N and the diversity of soil biota as influenced by nutrient enrichment.***

***#Regression***

```

EMF<-read.csv(file="Rawdata.csv")
x<-EMF[,c("MineralN")]
y<-EMF[,c("Bacterialdiversity")]
#"Bacterialdiversity,Fungaldiversity,Nematodediversity,BFdiversity,FFdiversity,PFdiversity,
#OMdiversity,PRdiversity"
cor.test(x,y,method = "pearson")
test=lm(y~x)
test
summary(test)

```

***#Figure***

```

EMF<-read.csv(file="Rawdata.csv")
EMF<-melt(EMF,id.vars=c(1:10,23,44,48), measure.vars = 11:18,
          variable.name = "Function", value.name = "value")
EMF$Treatment<-factor(EMF$Treatment,levels=c("NP0","NP30","NP90","NP120"))
p1<-
ggplot(data=EMF,mapping=aes(x=MineralN,y=value,shape=Treatment,fill=Treatment,colour=Treatment))
+
  geom_point(size=6,alpha=0.5)+
  scale_shape_manual(values = c(21,21,21,21))+
  scale_colour_manual(values = c("grey30","grey30","navy","tomato4"))+
  scale_fill_manual(values = c("white","grey70","blue3","red"))+
  geom_smooth(aes(group=All,linetype=All), color="black",method="lm", size=1.5, se=F)+
  scale_linetype_manual(values=c(1))+
  facet_wrap(~Function,scales="free",nrow = 2)+
  theme_bw()+
  theme(axis.text.x = element_text(size=12, angle = 0, hjust = 0.5),
        axis.text.y = element_text(size = 12),
        axis.title=element_text(size=14,face="bold"),
        axis.ticks.length = unit(0.1,"cm"),
        panel.grid = element_blank(),
        panel.background = element_blank(),
        panel.grid.major = element_blank(),
        panel.grid.minor = element_blank(),plot.background = element_blank()

```

p1

***#Figure S8 Relationships between soil available P and the diversity of soil biota as influenced by nutrient enrichment.***

***#Regression***

```

EMF<-read.csv(file="Rawdata.csv")
x<-EMF[,c("AvailableP")]
y<-EMF[,c("Bacterialdiversity")]
#"Bacterialdiversity,Fungaldiversity,Nematodediversity,BFdiversity,FFdiversity,PFdiversity,
#OMdiversity,PRdiversity"

```

```
cor.test(x,y,method = "pearson")
test=lm(y~x)
test
summary(test)
```

#### #Figure

```
EMF<-read.csv(file="Rawdata.csv")
EMF<-melt(EMF,id.vars=c(1:10,23,44,48), measure.vars = 11:18,
          variable.name = "Function", value.name = "value")
EMF$Treatment<-factor(EMF$Treatment,levels=c("NP0","NP30","NP90","NP120"))
p1<-
ggplot(data=EMF,mapping=aes(x=AvailableP,y=value,shape=Treatment,fill=Treatment,colour=Treatment))
+
  geom_point(size=6,alpha=0.5)+
  scale_shape_manual(values = c(21,21,21,21))+
  scale_colour_manual(values = c("grey30","grey30","navy","tomato4"))+
  scale_fill_manual(values = c("white","grey70","blue3","red"))+
  geom_smooth(aes(group=All,linetype=All), color="black",method="lm", size=1.5, se=F)+
  scale_linetype_manual(values=c(1))+
  facet_wrap(~Function,scales="free",nrow = 2)+
  theme_bw()+
  theme(axis.text.x = element_text(size=12, angle = 0, hjust = 0.5),
        axis.text.y = element_text(size = 12),
        axis.title=element_text(size=14,face="bold"),
        axis.ticks.length = unit(0.1,"cm"),
        panel.grid = element_blank(),
        panel.background = element_blank(),
        panel.grid.major = element_blank(),
        panel.grid.minor = element_blank(),plot.background = element_blank())
p1
```

#### *#Figure S9 Relationships between soil pH and the diversity of soil biota as influenced by nutrient enrichment.*

#### #Regression

```
EMF<-read.csv(file="Rawdata.csv")
x<-EMF[,c("pH")]
y<-EMF[,c("Bacterialdiversity")]
#"Bacterialdiversity,Fungaldiversity,Nematodediversity,BFdiversity,FFdiversity,PFdiversity,
#OMdiversity,PRdiversity"
cor.test(x,y,method = "pearson")
test=lm(y~x)
test
summary(test)
```

#### #Figure

```
EMF<-read.csv(file="Rawdata.csv")
EMF<-melt(EMF,id.vars=c(1:10,23,44,48), measure.vars = 11:18,
          variable.name = "Function", value.name = "value")
EMF$Treatment<-factor(EMF$Treatment,levels=c("NP0","NP30","NP90","NP120"))
p1<-ggplot(data=EMF,mapping=aes(x=pH,y=value,shape=Treatment,fill=Treatment,colour=Treatment))
+
  geom_point(size=6,alpha=0.5)+
  scale_shape_manual(values = c(21,21,21,21))+
  scale_colour_manual(values = c("grey30","grey30","navy","tomato4"))+
  scale_fill_manual(values = c("white","grey70","blue3","red"))+
  geom_smooth(aes(group=All,linetype=All), color="black",method="lm", size=1.5, se=F)+
  scale_linetype_manual(values=c(1))+
  facet_wrap(~Function,scales="free",nrow = 2)+
```

```

theme_bw()+
theme(axis.text.x = element_text(size=12, angle = 0, hjust = 0.5),
      axis.text.y = element_text(size = 12),
      axis.title=element_text(size=14,face="bold"),
      axis.ticks.length = unit(0.1,"cm"),
      panel.grid = element_blank(),
      panel.background = element_blank(),
      panel.grid.major = element_blank(),
      panel.grid.minor = element_blank(),plot.background = element_blank())
p1

```

***#Figure S10 Relationships between soil labile C and individual soil functions as influenced by nutrient enrichment.***

***#Regression***

```

EMF<-read.csv(file="Rawdata.csv")
x<-EMF[,c("LabileC")]
y<-EMF[,c("SOCStorage")]
#SOCStorage,Nstorage,Sugardegradation,Chitindegredation,Lignindegredation,
#Polymerdegradation,Pmineralization,SOCdecompositionpotential,Microbialactivity,MBC,MBN,#MBP,Ag
gregatestability,Parasiteresistance
cor.test(x,y,method = "pearson")
test=lm(y~x)
test
summary(test)

```

***#Figure***

```

EMF<-read.csv(file="Rawdata.csv")
EMF<-melt(EMF,id.vars=c(1:10,23,44,48), measure.vars = 30:43,
         variable.name = "Function", value.name = "value")
EMF$Treatment<-factor(EMF$Treatment,levels=c("NP0","NP30","NP90","NP120"))
p1<-
ggplot(data=EMF,mapping=aes(x=LabileC,y=value,shape=Treatment,fill=Treatment,colour=Treatment))+
  geom_point(size=6,alpha=0.5)+
  scale_shape_manual(values = c(21,21,21,21))+
  scale_colour_manual(values = c("grey30","grey30","navy","tomato4"))+
  scale_fill_manual(values = c("white","grey70","blue3","red"))+
  geom_smooth(aes(group=All,linetype=All), color="black",method="lm", size=1.5, se=F)+
  scale_linetype_manual(values=c(1))+
  facet_wrap(~Function,scales="free",nrow = 3)+
  theme_bw()+
  theme(axis.text.x = element_text(size=12, angle = 0, hjust = 0.5),
        axis.text.y = element_text(size = 12),
        axis.title=element_text(size=14,face="bold"),
        axis.ticks.length = unit(0.1,"cm"),
        panel.grid = element_blank(),
        panel.background = element_blank(),
        panel.grid.major = element_blank(),
        panel.grid.minor = element_blank(),plot.background = element_blank())
p1

```

***#Figure S11 Relationships between soil mineral N and individual soil functions as influenced by nutrient enrichment.***

***#Regression***

```

EMF<-read.csv(file="Rawdata.csv")
x<-EMF[,c("MineralN")]
y<-EMF[,c("SOCStorage")]
#SOCStorage,Nstorage,Sugardegradation,Chitindegredation,Lignindegredation,

```



```

#Polymerdegradation,Pmineralization,SOCdecompositionpotential,Microbialactivity,MBC,MBN,#MBP,Ag
gregatestability,Parasiteresistance
cor.test(x,y,method = "pearson")
test=lm(y~x)
test
summary(test)

```

#### #Figure

```

EMF<-read.csv(file="Rawdata.csv")
EMF<-melt(EMF,id.vars=c(1:10,23,44,48), measure.vars = 30:43,
          variable.name = "Function", value.name = "value")
EMF$Treatment<-factor(EMF$Treatment,levels=c("NP0","NP30","NP90","NP120"))
p1<-
ggplot(data=EMF,mapping=aes(x=MineralN,y=value,shape=Treatment,fill=Treatment,colour=Treatment))
+
  geom_point(size=6,alpha=0.5)+
  scale_shape_manual(values = c(21,21,21,21))+
  scale_colour_manual(values = c("grey30","grey30","navy","tomato4"))+
  scale_fill_manual(values = c("white","grey70","blue3","red"))+
  geom_smooth(aes(group=All,linetype=All), color="black",method="lm", size=1.5, se=F)+
  scale_linetype_manual(values=c(1))+
  facet_wrap(~Function,scales="free",nrow = 3)+
  theme_bw()+
  theme(axis.text.x = element_text(size=12, angle = 0, hjust = 0.5),
        axis.text.y = element_text(size = 12),
        axis.title=element_text(size=14,face="bold"),
        axis.ticks.length = unit(0.1,"cm"),
        panel.grid = element_blank(),
        panel.background = element_blank(),
        panel.grid.major = element_blank(),
        panel.grid.minor = element_blank(),plot.background = element_blank())
p1

```

#### ***#Figure S12 Relationships between soil available P and individual soil functions as influenced by nutrient enrichment.***

#### #Regression

```

EMF<-read.csv(file="Rawdata.csv")
x<-EMF[,c("AvailableP")]
y<-EMF[,c("SOCStorage")]
#SOCStorage,Nstorage,Sugardegradation,Chitindegredation,Lignindegredation,
#Polymerdegradation,Pmineralization,SOCdecompositionpotential,Microbialactivity,MBC,MBN,#MBP,Ag
gregatestability,Parasiteresistance
cor.test(x,y,method = "pearson")
test=lm(y~x)
test
summary(test)

```

#### #Figure

```

EMF<-read.csv(file="Rawdata.csv")
EMF<-melt(EMF,id.vars=c(1:10,23,44,48), measure.vars = 30:43,
          variable.name = "Function", value.name = "value")
EMF$Treatment<-factor(EMF$Treatment,levels=c("NP0","NP30","NP90","NP120"))
p1<-
ggplot(data=EMF,mapping=aes(x=AvailableP,y=value,shape=Treatment,fill=Treatment,colour=Treatment))
+
  geom_point(size=6,alpha=0.5)+

```

```

scale_shape_manual(values = c(21,21,21,21))+
scale_colour_manual(values =c("grey30","grey30","navy","tomato4"))+
scale_fill_manual(values = c("white","grey70","blue3","red"))+
geom_smooth(aes(group=All,linetype=All), color="black",method="lm", size=1.5, se=F)+
scale_linetype_manual(values=c(1))+
facet_wrap(~Function,scales="free",nrow = 3)+
theme_bw()+
theme(axis.text.x = element_text(size=12, angle = 0, hjust = 0.5),
      axis.text.y = element_text(size = 12),
      axis.title=element_text(size=14,face="bold"),
      axis.ticks.length = unit(0.1,"cm"),
      panel.grid = element_blank(),
      panel.background = element_blank(),
      panel.grid.major = element_blank(),
      panel.grid.minor = element_blank(),plot.background = element_blank())

```

p1

***#Figure S13 Relationships between soil pH and individual soil functions as influenced by nutrient enrichment.***

***#Regression***

```

EMF<-read.csv(file="Rawdata.csv")
x<-EMF[,c("pH")]
y<-EMF[,c("SOCStorage")]
#SOCStorage,Nstorage,Sugardegradation,Chitindegredation,Lignindegredation,
#Polymerdegradation,Pmineralization,SOCdecompositionpotential,Microbialactivity,MBC,MBN,#MBP,Ag
#gregatestability,Parasiteresistance
cor.test(x,y,method = "pearson")
test=lm(y~x)
test
summary(test)

```

***#Figure***

```

EMF<-read.csv(file="Rawdata.csv")
EMF<-melt(EMF,id.vars=c(1:10,23,44,48), measure.vars = 30:43,
         variable.name = "Function", value.name = "value")
EMF$Treatment<-factor(EMF$Treatment,levels=c("NP0","NP30","NP90","NP120"))
p1<-ggplot(data=EMF,mapping=aes(x=pH,y=value,shape=Treatment,fill=Treatment,colour=Treatment))+
  geom_point(size=6,alpha=0.5)+
  scale_shape_manual(values = c(21,21,21,21))+
  scale_colour_manual(values =c("grey30","grey30","navy","tomato4"))+
  scale_fill_manual(values = c("white","grey70","blue3","red"))+
  geom_smooth(aes(group=All,linetype=All), color="black",method="lm", size=1.5, se=F)+
  scale_linetype_manual(values=c(1))+
  facet_wrap(~Function,scales="free",nrow = 3)+
  theme_bw()+
  theme(axis.text.x = element_text(size=12, angle = 0, hjust = 0.5),
        axis.text.y = element_text(size = 12),
        axis.title=element_text(size=14,face="bold"),
        axis.ticks.length = unit(0.1,"cm"),
        panel.grid = element_blank(),
        panel.background = element_blank(),
        panel.grid.major = element_blank(),
        panel.grid.minor = element_blank(),plot.background = element_blank())

```

p1

***#Figure S14 Nutrient enrichment weakened the relationship between the diversity of single soil biota***

### *group and EMF at all three nutrient addition levels.*

#### *#Regression*

```
EMF<-read.csv(file="Rawdata.csv")
EMF<-EMF[EMF$Treatment=="NP0",] ##"NP0,NP30,NP90,NP120"
x<-EMF[,c("Nematodediversity1")] ##"Bacterialdiversity1,Fungaldiversity1,Nematodediversity1"
y<-EMF[,c("Multifunction")]
cor.test(x,y,method = "pearson")
test=lm(y~x)
test
summary(test)

library(Rmisc)
library(ggplot2)
library(reshape2)
library(ggsci)
EMF<-read.csv(file="Rawdata.csv")
EMF1<-melt(EMF,id.vars=c(1:10,23,44,48), measure.vars = 54:56,
          variable.name = "Function", value.name = "value")
EMF1$Treatment<-factor(EMF$Treatment,levels=c("NP0","NP30","NP90","NP120"))
p1<-
ggplot(data=EMF1,mapping=aes(x=value,y=Multifunction,color=Treatment,fill=Treatment,shape=Function)))+
  geom_point(aes(color=Treatment),size=3,alpha=0.5)+
  scale_shape_manual(values = c(21,22,24))+
  scale_colour_manual(values = c("grey30","grey30","navy","tomato4"))+
  scale_fill_manual(values = c("white","grey70","blue3","red"))+
  geom_smooth(aes(group=Function,linetype=Function),color="black", method="lm", size=1.5, se=F)+
  scale_linetype_manual(values=c(1,2,3))+
  ggpubr::stat_cor(aes(color = Treatment), r.digits = 2,p.digits = 2)+
  facet_wrap(~Treatment,scales="free",nrow = 2)+
  theme_bw()+
  theme(axis.text.x = element_text(size=12,colour="black", angle = 0, hjust = 0.5),
        axis.text.y = element_text(size = 12,colour="black"),
        axis.title=element_text(size=14,face="bold"),
        axis.ticks.length = unit(0.1,"cm"),
        #axis.ticks=element_line(linetype=1,color="black",size=1),
        #panel.spacing.x = unit(10, 'mm'),
        legend.position="right",
        panel.grid = element_blank(),
        panel.background = element_blank(),
        panel.grid.major = element_blank(),
        panel.grid.minor = element_blank(),plot.background = element_blank())
plot(p1)
```

### *#Figure S15 Effects of nutrient enrichment on microbial community structure*

#### *#Anova*

```
EMF<-read.csv(file="Rawdata.csv")
myaov=aov(Bacterialbiomass~Treatment,data=EMF)
##"Bacterialbiomass, Fungalbiomass, BaFu, GP,GN,GPGN"
summary(myaov)
LSD.test(myaov,"Treatment", p.adj="bonferroni", console=T)
```

#### *#Figure*

```
setwd("D:/Submission/8-Fertilization-EMF/NC-revision/Final/data")
EMF<-read.csv(file="Rawdata.csv")
EMF<-melt(EMF,id.vars=1:6, measure.vars = 24:29,
```

```

    variable.name = "Function", value.name = "value")
myhisto<-summarySE(EMF, measurevar="value",groupvars=c("Function","Treatment"))
myhisto$Treatment<-factor(myhisto$Treatment,levels=c("NP0","NP30","NP90","NP120"))
ggplot(myhisto, aes(x=Treatment, y=value,fill=Treatment,colour=Treatment))+
  geom_point(position=position_dodge(0.8),stat="identity",size=6, shape=21)+
  geom_errorbar(aes(ymin=value-
se,ymax=value+se),width=0.2,colour="black",position=position_dodge(0.8),size=0.8)+
  geom_jitter(data=EMF,aes(fill=Treatment),position=position_jitter(0.2),shape=21, size=3, alpha=0.2)+
  facet_wrap(~Function,scales="free",nrow = 2)+ #,nrow = 4
  theme_bw()+
  theme(panel.background = element_blank(),
        panel.grid.major = element_blank(),
        panel.grid.minor = element_blank(),plot.background = element_blank(),
        axis.text.x = element_text(size=12,colour="black", angle = 0, hjust = 0.5),
        axis.text.y = element_text(size = 10)) +
  scale_colour_manual(values=c("grey30","grey30","navy","tomato4"))+
  scale_fill_manual(values=c("white","grey70","blue3","red"))

```

***#Figure S16 Effects of nutrient enrichment on the relative abundance of nematode genera.***

```

library(ggplot2)
library(Rmisc)
library(reshape2)
library(BBmisc)
library(readxl)

spe <- read_excel("D:/Submission/8-Fertilization-EMF/NC-revision/Final/data/Soil biota community.xlsx",
sheet = 1)

#spe<-normalize(spe, method="range", margin=2)
spe1 <- melt(spe,id.vars=1:6,measurevar=7:82,variable.name = "nematode", value.name = "value")
#need to insert a column regarding treatment
dfc <- summarySE(spe1, measurevar="value",groupvars=c("nematode","Treatment"))

dfc$Treatment <- factor(dfc$Treatment, levels =unique(spe$Treatment))
#write.csv(dfc,file="dfc.csv")

p <- ggplot(dfc, aes(x=Treatment,y=nematode)) +
  xlab("samples") +
  theme_classic() +
  theme(axis.ticks = element_blank(),
        axis.line = element_blank()) +
  labs(x="Site",y="Nematode genera")+
  theme(panel.grid.major = element_blank()) +
  theme(legend.key=element_blank()) +
  theme(axis.text.x=element_text(size=12,colour="black",angle=0,hjust=0.5, vjust=1),
        axis.text.y = element_text(size = 11,colour="black"),) +
  theme(legend.position="right") +
  geom_tile(aes(fill=value)) +
  scale_fill_gradient2("Relative abundance",
                      low = "navy",
                      high = "red3")

p###9.4*6.25
ggsave("Relative abundance.pdf", plot=p, width = 150, height = 550, units = "mm")

```

**Supplementary references**

1. Bossio, D. A., Scow, K. M., Gunapala, N. & Graham, K. J. Determinants of soil microbial communities: Effects of agricultural management, season, and soil type on phospholipid fatty acid profiles. *Microb. Ecol.* **36**, 1–12 (1998).
2. Delgado-Baquerizo, M. *et al.* Multiple elements of soil biodiversity drive ecosystem functions across biomes. *Nat. Ecol. Evol.* **4**, 210–220 (2020).
3. Jiao, S., Lu, Y. & Wei, G. Soil multitrophic network complexity enhances the link between biodiversity and multifunctionality in agricultural systems. *Glob. Chang. Biol.* **28**, 140–153 (2022).
4. Baldock, J. A. & Smernik, R. J. Chemical composition and bioavailability of thermally altered *Pinus resinosa* (Red pine) wood. *Org. Geochem.* **33**, 1093–1109 (2002).
5. Fanin, N. *et al.* Consistent effects of biodiversity loss on multifunctionality across contrasting ecosystems. *Nat. Ecol. Evol.* **2**, 269–278 (2018).
6. Fierer, N. & Schimel, J. P. A Proposed Mechanism for the Pulse in Carbon Dioxide Production Commonly Observed Following the Rapid Rewetting of a Dry Soil. *Soil Sci. Soc. Am. J.* **67**, 798–805 (2003).
7. García, C., Hernández, T. & Costa, F. Microbial activity in soils under mediterranean environmental conditions. *Soil Biol. Biochem.* **26**, 1185–1191 (1994).
8. Liu, T. *et al.* Earthworms Coordinate Soil Biota to Improve Multiple Ecosystem Functions. *Curr. Biol.* **29**, 3420-3429.e5 (2019).
9. Amézketa, E. Soil aggregate stability: A review. *J. Sustain. Agric.* **14**, 83–151 (1999).
10. Bai, T., Wang, P., Ye, C. & Hu, S. Form of nitrogen input dominates N effects on root growth and soil aggregation: A meta-analysis. *Soil Biol. Biochem.* **157**, 108251 (2021).
11. Bakonyi, G. & Nagy, P. Temperature- and moisture-induced changes in the structure of the nematode fauna of a semiarid grassland - patterns and mechanisms. *Glob. Chang. Biol.* **6**, 697–707 (2000).
12. Hu, Z. *et al.* Responses of rice paddy micro-food webs to elevated CO<sub>2</sub> are modulated by nitrogen fertilization and crop cultivars. *Soil Biol. Biochem.* **114**, 104–113 (2017).
13. Topalović, O. & Geisen, S. Nematodes as suppressors and facilitators of plant performance. *New Phytol.* (2023).
